# Supplementary material for: Ischemic stroke and sarcopenia have an asymmetric bidirectional relationship based on a two-sample Mendelian randomization study
Source: Front Neurol. 2024 Oct 9;15:1427692. doi: 10.3389/fneur.2024.1427692 (PMC11499911; doi:10.3389/fneur.2024.1427692)
Supplement: Supplementary file 2 [file Table_1.xlsx]

## Sheet: Sheet1
Supplementary Table 1	Characteristics of selected SNPs concerning the causal effect of Appendicular lean mass on IS and subtypes
Supplementary Table 2	Characteristics of selected SNPs concerning the causal effect of Hand grip strength (left) on IS and subtypes
Supplementary Table 3	Characteristics of selected SNPs concerning the causal effect of Hand grip strength (right) on IS and subtypes
Supplementary Table 4	Characteristics of selected SNPs concerning the causal effect of Usual walking pace on IS and subtypes
Supplementary Table 5	Characteristics of selected SNPs concerning the causal effect of AIS on sarcopenia-related traits
Supplementary Table 6	Characteristics of selected SNPs concerning the causal effect of LAS on sarcopenia-related traits
Supplementary Table 7	Characteristics of selected SNPs concerning the causal effect of CES on sarcopenia-related traits
Supplementary Table 8	Removing the following SNPs for being palindromic with intermediate allele frequencies
Supplementary Table 9	The removed potential confounder-related SNPs
Supplementary Table 10	The removed abnormal SNPs in MR-PRESSO analysis
Supplementary Table 11	The SNP corresponds to the gene name

## Sheet: Supplementary Table 1
exposure	SNP	effect_allele.exposure	other_allele.exposure	pval.exposure	beta.exposure	se.exposure	eaf.exposure	R2	F
Appendicular lean mass	rs200439	C	A	1.51e-08	-0.0128	0.0023	0.2207	5.64e-05	25.3762
Appendicular lean mass	rs2807339	C	T	1.24e-13	0.0162	0.0022	0.7586	9.61e-05	43.281
Appendicular lean mass	rs150188352	CAAT	C	8.43e-38	0.0305	0.0024	0.1935	0.000290345	130.763
Appendicular lean mass	rs60804050	A	G	5.01e-24	-0.0217	0.0021	0.2559	0.000179329	80.7558
Appendicular lean mass	rs2025808	A	C	1.72e-08	0.0122	0.0022	0.2541	5.64e-05	25.4041
Appendicular lean mass	rs6693481	C	T	2.21e-12	-0.0143	0.002	0.6951	8.67e-05	39.0292
Appendicular lean mass	rs61827272	C	T	7.89e-12	0.0144	0.0021	0.2754	8.28e-05	37.2648
Appendicular lean mass	rs12724708	T	A	1.66e-35	0.0243	0.002	0.3574	0.00027123	122.152
Appendicular lean mass	rs3033487	TCC	T	1.93e-10	0.0153	0.0024	0.8119	7.15e-05	32.1944
Appendicular lean mass	rs11260623	T	G	4.86e-10	0.0117	0.0019	0.5085	6.84e-05	30.8099
Appendicular lean mass	rs212526	C	T	3.84e-29	0.0214	0.0019	0.6007	0.000219692	98.9361
Appendicular lean mass	rs7522400	G	A	5.62e-09	0.0129	0.0022	0.7683	5.92e-05	26.677
Appendicular lean mass	rs670318	C	T	2.52e-21	0.0413	0.0044	0.9515	0.000157428	70.8915
Appendicular lean mass	rs2025609	G	C	2e-12	0.0186	0.0026	0.8511	8.77e-05	39.4834
Appendicular lean mass	rs7543202	G	A	2.86e-11	0.0129	0.0019	0.6229	7.82e-05	35.2017
Appendicular lean mass	rs11590254	T	A	4.34e-20	0.0186	0.002	0.3114	0.000148368	66.8115
Appendicular lean mass	rs34654458	ATTT	A	5.72e-24	-0.0191	0.0019	0.5784	0.00017792	80.1213
Appendicular lean mass	rs4644481	T	C	3.54e-09	-0.0112	0.0019	0.4328	6.16e-05	27.7307
Appendicular lean mass	rs7367519	C	T	4.68e-16	0.0164	0.002	0.6846	0.000116149	52.3012
Appendicular lean mass	rs951366	C	T	9.15e-27	0.0205	0.0019	0.3932	0.000200538	90.3086
Appendicular lean mass	rs7418410	T	C	5.64e-16	0.0155	0.0019	0.4089	0.000116137	52.2958
Appendicular lean mass	rs7543136	T	C	9.96e-24	-0.021	0.0021	0.7209	0.000177461	79.9145
Appendicular lean mass	rs55717234	G	A	1.34e-10	0.0122	0.0019	0.5732	7.28e-05	32.7912
Appendicular lean mass	rs11580040	G	A	6.76e-21	0.0325	0.0035	0.08	0.00015548	70.0144
Appendicular lean mass	rs2209098	C	T	1.73e-32	0.024	0.002	0.3108	0.000246762	111.13
Appendicular lean mass	rs17278379	C	T	2.4e-15	0.0226	0.0029	0.124	0.000110962	49.965
Appendicular lean mass	rs66579625	CT	C	8.91e-21	0.0178	0.0019	0.5837	0.000153981	69.3391
Appendicular lean mass	rs4655345	G	A	5.81e-38	-0.0246	0.0019	0.3974	0.000289839	130.535
Appendicular lean mass	rs1797070	A	G	4.93e-25	0.0219	0.0021	0.2684	0.000188354	84.8206
Appendicular lean mass	rs12563442	C	T	9.93e-09	0.0122	0.0021	0.2669	5.82e-05	26.226
Appendicular lean mass	rs80295797	T	C	3.83e-23	-0.0198	0.002	0.3265	0.000172417	77.6428
Appendicular lean mass	rs4274112	G	A	2.47e-28	-0.0217	0.002	0.3733	0.000220327	99.222
Appendicular lean mass	rs113107560	G	T	6.99e-23	-0.019	0.0019	0.4118	0.000174883	78.7534
Appendicular lean mass	rs12074850	G	A	2.72e-33	0.0393	0.0033	0.0898	0.000252481	113.706
Appendicular lean mass	rs1514134	C	T	3.57e-09	-0.0114	0.0019	0.3849	6.15e-05	27.708
Appendicular lean mass	rs3768495	T	C	1.07e-17	-0.0178	0.0021	0.7173	0.000128498	57.8625
Appendicular lean mass	rs28736838	T	C	1.07e-08	-0.0117	0.002	0.3017	5.77e-05	25.971
Appendicular lean mass	rs200091076	GT	G	6.92e-09	-0.0117	0.002	0.6464	6.26e-05	28.1765
Appendicular lean mass	rs6675858	T	C	2.4e-09	-0.0137	0.0023	0.2141	6.32e-05	28.4399
Appendicular lean mass	rs2789365	T	C	1.14e-14	-0.0145	0.0019	0.4807	0.000104968	47.266
Appendicular lean mass	rs377599	T	C	3.5e-29	0.0217	0.0019	0.383	0.000222553	100.225
Appendicular lean mass	rs11121615	T	C	3.32e-23	-0.0202	0.002	0.6894	0.000174745	78.6912
Appendicular lean mass	rs2791654	A	G	1.21e-28	-0.0239	0.0022	0.7062	0.000237031	106.746
Appendicular lean mass	rs6425817	G	A	2.98e-15	0.0157	0.002	0.6724	0.000108593	48.8982
Appendicular lean mass	rs2885697	T	G	9.21e-60	-0.0323	0.002	0.665	0.000464838	209.386
Appendicular lean mass	rs4847378	T	G	1.64e-12	0.0136	0.0019	0.6121	8.78e-05	39.5488
Appendicular lean mass	rs1405227	A	G	1.57e-10	0.0129	0.002	0.3167	7.2e-05	32.4299
Appendicular lean mass	rs1325596	A	G	2.77e-52	0.0287	0.0019	0.5476	0.000408112	183.824
Appendicular lean mass	rs200348453	AG	A	7.88e-21	0.018	0.0019	0.4736	0.000161548	72.7475
Appendicular lean mass	rs234640	T	C	3.87e-12	-0.0131	0.0019	0.5142	8.57e-05	38.6051
Appendicular lean mass	rs1005723	T	C	1.79e-11	0.0161	0.0024	0.1908	8e-05	36.0409
Appendicular lean mass	rs10171272	A	C	2.87e-11	0.0136	0.002	0.3035	7.82e-05	35.21
Appendicular lean mass	rs17681189	A	C	5.82e-12	-0.0131	0.0019	0.4231	8.38e-05	37.7222
Appendicular lean mass	rs76517946	A	C	1.69e-26	-0.0368	0.0035	0.0814	0.000202524	91.2031
Appendicular lean mass	rs867529	C	G	1e-18	0.0184	0.0021	0.2796	0.000136388	61.4159
Appendicular lean mass	rs6543146	G	T	4.19e-16	0.0154	0.0019	0.5579	0.00011699	52.6798
Appendicular lean mass	rs6738207	A	G	4.14e-11	0.0127	0.0019	0.4007	7.75e-05	34.8803
Appendicular lean mass	rs71414738	T	C	1e-09	0.015	0.0025	0.1763	6.53e-05	29.4244
Appendicular lean mass	rs13430869	T	G	6.37e-37	0.0272	0.0021	0.7427	0.000282762	127.347
Appendicular lean mass	rs17408561	G	A	6e-10	0.0123	0.002	0.3908	7.2e-05	32.4363
Appendicular lean mass	rs17246129	A	G	1.27e-35	0.0254	0.002	0.3044	0.000273213	123.045
Appendicular lean mass	rs2305141	G	A	1.07e-21	0.0183	0.0019	0.5961	0.000161259	72.6173
Appendicular lean mass	rs2971857	A	G	3.7e-10	-0.0119	0.0019	0.5752	6.92e-05	31.1604
Appendicular lean mass	rs10203320	C	T	7.86e-12	0.0138	0.002	0.3289	8.41e-05	37.8548
Appendicular lean mass	rs144627572	A	G	1.3e-16	0.0439	0.0053	0.0329	0.000122638	55.2236
Appendicular lean mass	rs650508	C	G	1.86e-10	-0.013	0.002	0.3008	7.11e-05	32.009
Appendicular lean mass	rs60142646	TC	T	2.49e-08	-0.0237	0.0042	0.9479	5.55e-05	24.9802
Appendicular lean mass	rs75022676	A	G	2.84e-12	-0.0163	0.0023	0.2079	8.75e-05	39.4024
Appendicular lean mass	rs199647708	A	G	3.43e-09	0.0114	0.0019	0.3969	6.22e-05	28.0145
Appendicular lean mass	rs17400325	C	T	2.1e-13	0.0345	0.0047	0.0415	9.47e-05	42.6378
Appendicular lean mass	rs1035583	A	G	1.99e-14	0.0148	0.0019	0.6177	0.000103451	46.5828
Appendicular lean mass	rs7598430	T	C	1.37e-17	-0.016	0.0019	0.5046	0.000127989	57.6333
Appendicular lean mass	rs10202701	T	C	3.11e-33	0.0227	0.0019	0.5419	0.000255836	115.217
Appendicular lean mass	rs10205141	G	A	4.71e-08	0.0241	0.0044	0.0476	5.27e-05	23.7115
Appendicular lean mass	rs10202845	G	A	5.35e-22	-0.0288	0.003	0.1133	0.000166656	75.048
Appendicular lean mass	rs67716382	C	G	1.65e-23	0.0226	0.0023	0.2214	0.000176092	79.2977
Appendicular lean mass	rs2717008	C	T	4.99e-11	-0.0127	0.0019	0.3835	7.63e-05	34.3411
Appendicular lean mass	rs4852257	G	T	6.21e-34	-0.0231	0.0019	0.5763	0.000260592	117.36
Appendicular lean mass	rs201570119	C	T	5.48e-17	0.0194	0.0023	0.2098	0.000124789	56.1921
Appendicular lean mass	rs35223841	GAA	G	4.25e-08	0.0106	0.0019	0.3891	5.34e-05	24.0515
Appendicular lean mass	rs55852614	C	T	3.29e-73	-0.0393	0.0022	0.2474	0.000575147	259.104
Appendicular lean mass	rs3063063	TGAA	T	2.57e-19	-0.0182	0.002	0.6862	0.000142652	64.2367
Appendicular lean mass	rs144343497	TA	T	5.06e-09	-0.0134	0.0023	0.2164	6.09e-05	27.4197
Appendicular lean mass	rs700677	A	C	1.13e-18	0.0173	0.002	0.3505	0.000136267	61.3612
Appendicular lean mass	rs12997625	T	C	1.5e-19	-0.017	0.0019	0.5266	0.000144091	64.885
Appendicular lean mass	rs3116194	A	T	8.29e-21	-0.0295	0.0032	0.0978	0.000153573	69.1556
Appendicular lean mass	rs7570235	C	T	2.08e-18	-0.0168	0.0019	0.5911	0.000136435	61.4371
Appendicular lean mass	rs6721191	G	A	3.17e-14	-0.0144	0.0019	0.5779	0.000101163	45.5525
Appendicular lean mass	rs12713004	G	A	2.4e-68	0.0367	0.0021	0.7254	0.000536587	241.723
Appendicular lean mass	rs6739278	C	T	1.27e-18	-0.021	0.0024	0.8079	0.000136884	61.6394
Appendicular lean mass	rs2347603	A	T	5.65e-17	-0.0181	0.0022	0.7418	0.000125496	56.5106
Appendicular lean mass	rs702886	G	A	1.11e-09	0.012	0.002	0.3505	6.56e-05	29.5211
Appendicular lean mass	rs55980611	A	C	4.22e-09	0.0164	0.0028	0.1457	6.7e-05	30.1482
Appendicular lean mass	rs72809820	T	C	3.13e-08	-0.0111	0.002	0.324	5.4e-05	24.3017
Appendicular lean mass	rs9636364	A	G	5.09e-09	0.011	0.0019	0.5429	6.01e-05	27.0407
Appendicular lean mass	rs10864899	G	A	3.85e-09	-0.0112	0.0019	0.5643	6.17e-05	27.7738
Appendicular lean mass	rs488621	G	A	2.86e-24	0.0191	0.0019	0.4688	0.000181695	81.8213
Appendicular lean mass	rs2138374	C	T	2.79e-13	-0.0149	0.002	0.696	9.39e-05	42.303
Appendicular lean mass	rs10221831	T	C	1.8e-08	0.03	0.0053	0.0321	5.59e-05	25.1813
Appendicular lean mass	rs17773965	T	C	1.51e-09	-0.0163	0.0027	0.1412	6.44e-05	29.0138
Appendicular lean mass	rs3769598	G	A	1.32e-10	0.0171	0.0027	0.1438	7.2e-05	32.4215
Appendicular lean mass	rs202098543	AT	A	1.56e-11	0.0132	0.002	0.5806	8.49e-05	38.209
Appendicular lean mass	rs59985551	T	C	2.43e-44	-0.0313	0.0022	0.2261	0.00034285	154.418
Appendicular lean mass	rs62143873	A	G	1.19e-09	-0.0115	0.0019	0.5033	6.61e-05	29.7729
Appendicular lean mass	rs12616192	A	G	6.83e-12	-0.0261	0.0038	0.0676	8.59e-05	38.6672
Appendicular lean mass	rs61397287	T	A	4.45e-11	0.0235	0.0036	0.0747	7.63e-05	34.3753
Appendicular lean mass	rs34788019	CA	C	2.84e-13	-0.0139	0.0019	0.5433	9.59e-05	43.1735
Appendicular lean mass	rs1478575	A	T	5.2e-54	0.0312	0.002	0.6843	0.000420591	189.447
Appendicular lean mass	rs11684531	G	A	4.17e-10	-0.0172	0.0028	0.1328	6.81e-05	30.6817
Appendicular lean mass	rs1899040	T	C	9.04e-11	0.0152	0.0023	0.7962	7.5e-05	33.7615
Appendicular lean mass	rs2270894	G	C	1.25e-42	-0.0332	0.0024	0.2034	0.000357188	160.878
Appendicular lean mass	rs6789000	T	G	1.61e-09	0.0121	0.002	0.6449	6.71e-05	30.1938
Appendicular lean mass	rs4504126	C	A	1.62e-15	0.046	0.0058	0.0275	0.00011318	50.9638
Appendicular lean mass	rs140440099	A	G	1.45e-22	0.0613	0.0063	0.0234	0.000171745	77.3398
Appendicular lean mass	rs4682483	A	G	2.65e-10	-0.0165	0.0026	0.1534	7.07e-05	31.8403
Appendicular lean mass	rs4683435	G	A	1.6e-10	0.0144	0.0022	0.7723	7.29e-05	32.8383
Appendicular lean mass	rs900399	G	A	1.35e-17	0.0164	0.0019	0.3986	0.000128949	58.0657
Appendicular lean mass	rs9647379	C	G	5.55e-29	0.0215	0.0019	0.4111	0.000223818	100.795
Appendicular lean mass	rs11720869	A	G	2.54e-12	0.0141	0.002	0.6686	8.81e-05	39.6707
Appendicular lean mass	rs336630	T	C	2.9e-08	-0.0106	0.0019	0.43	5.51e-05	24.8001
Appendicular lean mass	rs9838614	G	T	1.21e-21	-0.0185	0.0019	0.3881	0.000162554	73.2004
Appendicular lean mass	rs6762851	C	T	1.5e-28	-0.0218	0.002	0.3573	0.000218265	98.2934
Appendicular lean mass	rs182798714	T	A	1.45e-09	0.0376	0.0062	0.0274	7.54e-05	33.9288
Appendicular lean mass	rs36012032	A	C	9.93e-20	0.0298	0.0033	0.091	0.000146916	66.1571
Appendicular lean mass	rs839255	G	T	8.38e-10	-0.0126	0.0021	0.6847	6.85e-05	30.8653
Appendicular lean mass	rs9809116	G	A	1.31e-16	-0.016	0.0019	0.4081	0.000123676	55.6908
Appendicular lean mass	rs7633464	A	G	1.27e-20	0.0175	0.0019	0.4786	0.000152844	68.8274
Appendicular lean mass	rs115010283	C	G	2.35e-63	0.034	0.002	0.3162	0.000499895	225.186
Appendicular lean mass	rs61732778	A	G	3.13e-10	0.023	0.0037	0.071	6.98e-05	31.4221
Appendicular lean mass	rs4076108	T	A	2.3e-15	0.0174	0.0022	0.2449	0.000111975	50.4215
Appendicular lean mass	rs34312629	G	C	2.12e-15	-0.017	0.0021	0.2613	0.000111567	50.2376
Appendicular lean mass	rs200739311	C	T	1.55e-10	-0.0128	0.002	0.6188	7.73e-05	34.8042
Appendicular lean mass	rs544136	G	T	2.5e-08	0.0121	0.0022	0.7482	5.52e-05	24.8395
Appendicular lean mass	rs4073154	G	A	1.92e-33	0.0274	0.0023	0.7784	0.000259002	116.644
Appendicular lean mass	rs2871960	C	A	2.17e-135	0.0469	0.0019	0.4448	0.0010864	489.674
Appendicular lean mass	rs71635721	G	C	3.46e-16	0.0316	0.0039	0.0649	0.000121201	54.5764
Appendicular lean mass	rs34390533	A	C	6.69e-32	-0.0257	0.0022	0.248	0.000246357	110.948
Appendicular lean mass	rs56239180	G	T	1.85e-13	-0.0459	0.0062	0.0237	9.75e-05	43.901
Appendicular lean mass	rs9828525	T	C	2.51e-10	0.0121	0.0019	0.4113	7.09e-05	31.9249
Appendicular lean mass	rs116493405	A	G	9.52e-12	0.0287	0.0042	0.0537	8.37e-05	37.6945
Appendicular lean mass	rs9832919	G	A	7.9e-20	-0.0179	0.002	0.3574	0.000147174	66.2736
Appendicular lean mass	rs1823217	G	A	4.06e-20	-0.0181	0.002	0.6449	0.000150048	67.5679
Appendicular lean mass	rs11461979	TA	T	9.8e-11	0.0143	0.0022	0.2649	7.96e-05	35.86
Appendicular lean mass	rs113289555	T	G	7.33e-20	-0.0206	0.0023	0.2333	0.000151811	68.3621
Appendicular lean mass	rs13127468	A	C	9.86e-11	-0.0123	0.0019	0.4629	7.52e-05	33.8735
Appendicular lean mass	rs10005035	G	C	6.51e-17	-0.0175	0.0021	0.2823	0.000124097	55.8803
Appendicular lean mass	rs781669	T	C	3.14e-18	0.0164	0.0019	0.5236	0.00013418	60.4216
Appendicular lean mass	rs145126099	TTGTCAGGTCTTTGTGGTGAGCTGAATTC	T	3.29e-11	-0.0126	0.0019	0.472	7.91e-05	35.6309
Appendicular lean mass	rs1443536	G	A	1.91e-26	0.0218	0.0021	0.305	0.000201478	90.7319
Appendicular lean mass	rs72657800	C	T	6.39e-10	-0.0219	0.0035	0.0773	6.84e-05	30.8058
Appendicular lean mass	rs11098677	T	G	3.94e-30	-0.0263	0.0023	0.7875	0.0002315	104.255
Appendicular lean mass	rs12512942	A	G	1.58e-16	-0.0162	0.002	0.6376	0.000121282	54.6128
Appendicular lean mass	rs10019221	T	G	1.22e-10	-0.0124	0.0019	0.5974	7.4e-05	33.3035
Appendicular lean mass	rs36052389	AT	A	5.27e-12	0.0132	0.0019	0.4554	8.64e-05	38.9163
Appendicular lean mass	rs3103223	C	T	6.02e-09	0.0126	0.0022	0.7397	6.11e-05	27.5279
Appendicular lean mass	rs139921635	T	G	6.16e-10	0.0385	0.0062	0.0236	6.83e-05	30.7586
Appendicular lean mass	rs111612346	ATTCTT	A	4.25e-12	-0.0138	0.002	0.6401	8.77e-05	39.5095
Appendicular lean mass	rs34548509	GA	G	3.2e-09	0.0118	0.002	0.3574	6.4e-05	28.798
Appendicular lean mass	rs13123591	G	T	2.35e-20	0.0185	0.002	0.3375	0.00015305	68.9199
Appendicular lean mass	rs6821305	C	A	3.15e-26	0.0204	0.0019	0.399	0.00019959	89.8813
Appendicular lean mass	rs72695791	G	C	4.58e-09	-0.0297	0.0051	0.036	6.12e-05	27.5673
Appendicular lean mass	rs2324154	A	C	1.92e-15	0.015	0.0019	0.5096	0.000112459	50.6391
Appendicular lean mass	rs116339650	G	A	1.05e-09	-0.0175	0.0029	0.127	6.79e-05	30.5773
Appendicular lean mass	rs2303423	C	T	2.64e-08	0.0168	0.003	0.1095	5.5e-05	24.7837
Appendicular lean mass	rs13109280	G	A	9.15e-11	0.0131	0.002	0.6618	7.68e-05	34.5901
Appendicular lean mass	rs116052377	A	G	7.89e-11	0.0225	0.0035	0.0809	7.53e-05	33.8988
Appendicular lean mass	rs7689420	C	T	1.5e-76	0.0466	0.0025	0.8312	0.000609368	274.53
Appendicular lean mass	rs11721522	G	A	4.03e-08	0.0106	0.0019	0.4125	5.45e-05	24.5212
Appendicular lean mass	rs73856768	C	T	1.55e-12	-0.0247	0.0035	0.0805	9.03e-05	40.6683
Appendicular lean mass	rs111622870	C	T	1.86e-10	-0.0282	0.0044	0.0482	7.3e-05	32.8547
Appendicular lean mass	rs190823861	A	G	2.09e-14	-0.0345	0.0045	0.0466	0.000105762	47.6234
Appendicular lean mass	rs148617731	CAG	C	5.92e-22	0.041	0.0043	0.0519	0.000165432	74.4965
Appendicular lean mass	rs11727162	T	C	2.15e-19	-0.017	0.0019	0.4987	0.000144499	65.0688
Appendicular lean mass	rs2035901	G	A	9.43e-37	0.024	0.0019	0.4679	0.000286813	129.172
Appendicular lean mass	rs7679276	G	A	5.93e-12	-0.033	0.0048	0.9544	9.48e-05	42.6815
Appendicular lean mass	rs395980	G	T	1.02e-17	-0.0184	0.0021	0.2635	0.000131407	59.1727
Appendicular lean mass	rs2578565	T	C	1.37e-12	-0.0141	0.002	0.6575	8.95e-05	40.3189
Appendicular lean mass	rs12655296	T	C	1.62e-08	-0.011	0.002	0.6251	5.67e-05	25.5358
Appendicular lean mass	rs11959466	T	C	2.24e-19	0.038	0.0042	0.0564	0.000153697	69.2111
Appendicular lean mass	rs62370472	C	T	1.45e-27	-0.0253	0.0023	0.209	0.000211638	95.3083
Appendicular lean mass	rs10471339	G	C	1.45e-08	-0.011	0.0019	0.3823	5.71e-05	25.7316
Appendicular lean mass	rs36048468	T	C	9.34e-28	0.0254	0.0023	0.2088	0.000213164	95.9957
Appendicular lean mass	rs7735891	T	C	1.14e-42	0.0259	0.0019	0.4629	0.000333558	150.232
Appendicular lean mass	rs55758152	A	G	1.05e-12	0.0145	0.002	0.3263	9.24e-05	41.6231
Appendicular lean mass	rs57059662	C	T	5.63e-09	0.0118	0.002	0.6774	6.09e-05	27.4015
Appendicular lean mass	rs34313173	TA	T	3.17e-50	-0.0284	0.0019	0.4475	0.000398834	179.643
Appendicular lean mass	rs10461725	C	G	1.98e-11	0.0134	0.002	0.6561	8.1e-05	36.4856
Appendicular lean mass	rs4865956	A	T	3.85e-36	-0.0258	0.0021	0.6965	0.000281416	126.741
Appendicular lean mass	rs12517711	C	T	2.79e-14	-0.0147	0.0019	0.3917	0.000102976	46.3688
Appendicular lean mass	rs12188208	C	A	1.4e-18	-0.0195	0.0022	0.2349	0.000136679	61.5467
Appendicular lean mass	rs115912456	G	A	3.69e-34	0.0577	0.0047	0.0412	0.000263031	118.458
Appendicular lean mass	rs861674	T	A	1.36e-11	0.0128	0.0019	0.4578	8.13e-05	36.624
Appendicular lean mass	rs10068640	A	G	1.28e-08	0.0112	0.002	0.3651	5.82e-05	26.1851
Appendicular lean mass	rs2545339	G	A	3.48e-09	0.0115	0.002	0.6288	6.17e-05	27.7983
Appendicular lean mass	rs144622623	GGTGTGTGTGT	G	4.67e-11	0.0145	0.0022	0.7462	7.96e-05	35.8585
Appendicular lean mass	rs31196	A	C	2.07e-08	-0.0107	0.0019	0.5724	5.6e-05	25.2351
Appendicular lean mass	rs111365325	T	C	1.12e-33	-0.0271	0.0022	0.2312	0.000261078	117.579
Appendicular lean mass	rs6874142	G	T	5.15e-20	0.0288	0.0031	0.1138	0.000167297	75.3367
Appendicular lean mass	rs10075249	T	C	4.56e-14	0.0143	0.0019	0.4952	0.000102236	46.0354
Appendicular lean mass	rs10036789	G	C	1.16e-17	0.0163	0.0019	0.4609	0.000132033	59.4543
Appendicular lean mass	rs33986149	CA	C	2.23e-15	-0.0154	0.0019	0.3883	0.000112662	50.7307
Appendicular lean mass	rs261223	C	A	2.3e-19	0.0175	0.0019	0.3702	0.000142806	64.3061
Appendicular lean mass	rs12519407	C	A	3.38e-17	0.0181	0.0022	0.2567	0.000125019	56.2959
Appendicular lean mass	rs249677	A	C	2.4e-08	-0.0109	0.002	0.6333	5.52e-05	24.8469
Appendicular lean mass	rs13170063	A	G	4.11e-15	-0.0152	0.0019	0.5921	0.0001116	50.2527
Appendicular lean mass	rs447352	T	C	6.62e-10	-0.0181	0.0029	0.1408	7.93e-05	35.6914
Appendicular lean mass	rs7731023	G	A	3.48e-18	0.0166	0.0019	0.5749	0.000134688	60.6503
Appendicular lean mass	rs7448554	A	C	1.77e-11	-0.0132	0.002	0.4999	8.71e-05	39.2284
Appendicular lean mass	rs4282339	A	G	6.16e-41	-0.0311	0.0023	0.2075	0.000318103	143.269
Appendicular lean mass	rs244711	T	C	1.54e-37	0.0279	0.0022	0.686	0.000335345	151.037
Appendicular lean mass	rs40270	C	A	1.9e-11	0.0151	0.0022	0.7724	8.02e-05	36.0976
Appendicular lean mass	rs34287	A	G	1.17e-20	0.0187	0.002	0.341	0.000157164	70.7728
Appendicular lean mass	rs331917	G	A	3.54e-11	-0.0127	0.0019	0.5803	7.86e-05	35.376
Appendicular lean mass	rs6860245	C	G	9.66e-160	0.0589	0.0022	0.248	0.00129399	583.361
Appendicular lean mass	rs4976262	C	T	4.37e-33	-0.0245	0.002	0.3156	0.000259304	116.78
Appendicular lean mass	rs258794	T	G	6.23e-12	0.0147	0.0021	0.2764	8.64e-05	38.921
Appendicular lean mass	rs7701233	C	T	5.12e-21	-0.0179	0.0019	0.4283	0.000156911	70.6587
Appendicular lean mass	rs3792819	G	A	4.42e-10	0.021	0.0034	0.0854	6.89e-05	31.0193
Appendicular lean mass	rs11243202	C	T	2.83e-57	0.0302	0.0019	0.486	0.000455662	205.251
Appendicular lean mass	rs13209685	T	G	7.49e-27	0.0277	0.0026	0.1594	0.000205621	92.598
Appendicular lean mass	rs2142644	A	C	3.37e-19	-0.0181	0.002	0.672	0.000144421	65.0336
Appendicular lean mass	rs370927791	CT	C	4.99e-25	-0.0208	0.002	0.4962	0.000216308	97.4116
Appendicular lean mass	rs2268718	T	C	3.24e-11	0.0141	0.0021	0.2704	7.84e-05	35.3215
Appendicular lean mass	rs6931421	G	T	2.31e-43	-0.0279	0.002	0.3224	0.0003401	153.179
Appendicular lean mass	rs9391254	T	C	2.1e-16	0.0166	0.002	0.3205	0.000120023	54.0457
Appendicular lean mass	rs113898003	C	T	1.19e-63	-0.036	0.0021	0.2635	0.000503024	226.596
Appendicular lean mass	rs1933081	A	T	5.33e-15	0.0267	0.0034	0.0834	0.000108993	49.0784
Appendicular lean mass	rs141641494	CT	C	8.39e-09	-0.0115	0.002	0.3686	6.16e-05	27.7177
Appendicular lean mass	rs9385002	T	A	3.26e-11	-0.0147	0.0022	0.2394	7.87e-05	35.4343
Appendicular lean mass	rs7768382	C	T	1.57e-26	-0.0201	0.0019	0.4771	0.000201581	90.7785
Appendicular lean mass	rs372987459	TAC	T	6.85e-14	0.0147	0.002	0.6042	0.000103353	46.5384
Appendicular lean mass	rs2788213	A	G	3.8e-09	0.0123	0.0021	0.7104	6.23e-05	28.0294
Appendicular lean mass	rs2569888	A	G	2.29e-09	0.0133	0.0022	0.2449	6.54e-05	29.4578
Appendicular lean mass	rs876122	G	A	2.19e-08	0.0162	0.0029	0.8788	5.59e-05	25.1722
Appendicular lean mass	rs41271299	T	C	3.19e-47	0.0616	0.0043	0.0513	0.00036935	166.358
Appendicular lean mass	rs188617336	T	C	6.66e-11	0.0138	0.0021	0.2983	7.97e-05	35.8982
Appendicular lean mass	rs1319012	A	T	3.3e-45	-0.052	0.0037	0.9259	0.000371038	167.119
Appendicular lean mass	rs1324538	A	T	1.73e-34	0.0237	0.0019	0.3836	0.000265624	119.627
Appendicular lean mass	rs655113	C	T	7.42e-20	0.0188	0.0021	0.3006	0.000148614	66.9222
Appendicular lean mass	rs9344126	C	T	2.21e-22	-0.0185	0.0019	0.5137	0.000170997	77.0028
Appendicular lean mass	rs293517	C	T	2.8e-10	-0.013	0.0021	0.7011	7.08e-05	31.8932
Appendicular lean mass	rs7768973	A	T	5.44e-36	-0.024	0.0019	0.411	0.000278875	125.596
Appendicular lean mass	rs78051210	C	T	1.63e-13	0.0263	0.0036	0.0771	9.84e-05	44.3239
Appendicular lean mass	rs9343327	T	A	1.09e-13	0.014	0.0019	0.4985	9.8e-05	44.1275
Appendicular lean mass	rs35166681	TA	T	1.55e-16	0.0214	0.0026	0.159	0.000122476	55.1504
Appendicular lean mass	rs2754255	G	A	1.05e-11	-0.0153	0.0023	0.2245	8.15e-05	36.7021
Appendicular lean mass	rs6902109	G	A	1.03e-18	-0.0167	0.0019	0.5401	0.000138548	62.3887
Appendicular lean mass	rs599004	T	C	6.53e-14	-0.0157	0.0021	0.2807	9.95e-05	44.8198
Appendicular lean mass	rs2748501	A	G	1.31e-24	-0.0195	0.0019	0.4395	0.000187341	84.3646
Appendicular lean mass	rs718603	T	C	6.68e-10	0.0131	0.0021	0.2774	6.88e-05	30.9779
Appendicular lean mass	rs9266244	A	G	1.21e-94	-0.0427	0.0021	0.7077	0.000754334	339.889
Appendicular lean mass	rs72894003	T	C	1.9e-28	-0.0423	0.0038	0.0647	0.000216554	97.5225
Appendicular lean mass	rs6570509	T	G	1.27e-31	-0.0244	0.0021	0.2868	0.000243557	109.686
Appendicular lean mass	rs543650	G	T	1.49e-37	0.025	0.002	0.5987	0.000300323	135.258
Appendicular lean mass	rs3828729	G	A	4.67e-15	-0.016	0.002	0.3094	0.0001094	49.2617
Appendicular lean mass	rs2105333	G	T	1.7e-21	-0.019	0.002	0.6648	0.000160891	72.4515
Appendicular lean mass	rs2763263	A	T	1.37e-14	-0.017	0.0022	0.2445	0.000106768	48.0765
Appendicular lean mass	rs798548	C	T	2.86e-68	-0.0359	0.0021	0.3006	0.000541918	244.126
Appendicular lean mass	rs12533452	T	C	1.31e-19	0.0237	0.0026	0.1569	0.000148603	66.9173
Appendicular lean mass	rs34776209	T	C	1.78e-47	-0.0317	0.0022	0.2475	0.000374309	168.592
Appendicular lean mass	rs12536902	A	C	3.66e-09	0.0479	0.0081	0.0143	6.47e-05	29.1243
Appendicular lean mass	rs1880318	A	G	6.86e-10	0.0147	0.0024	0.2039	7.02e-05	31.5882
Appendicular lean mass	rs73696333	G	C	3.2e-15	0.0191	0.0024	0.2012	0.000117263	52.803
Appendicular lean mass	rs35732917	C	T	2.08e-22	0.0204	0.0021	0.2843	0.000169355	76.2635
Appendicular lean mass	rs139163241	G	T	1.79e-09	-0.0164	0.0027	0.1394	6.45e-05	29.0573
Appendicular lean mass	rs62466110	C	T	5.74e-20	-0.0371	0.0041	0.067	0.000172082	77.4915
Appendicular lean mass	rs143355941	TGAGA	T	4.65e-23	0.0189	0.0019	0.4374	0.000175805	79.1687
Appendicular lean mass	rs987666	A	G	2.33e-10	0.0185	0.0029	0.1188	7.17e-05	32.2657
Appendicular lean mass	rs62621812	A	G	3.16e-27	0.0743	0.0069	0.0204	0.000220641	99.3636
Appendicular lean mass	rs757834	C	T	1.25e-25	0.0256	0.0024	0.1856	0.000198119	89.2189
Appendicular lean mass	rs28529426	T	C	5.82e-11	-0.0168	0.0026	0.1711	8.01e-05	36.0479
Appendicular lean mass	rs10242866	T	C	3.66e-16	0.0157	0.0019	0.3983	0.000118146	53.2005
Appendicular lean mass	rs2237485	A	G	3.73e-17	0.0191	0.0023	0.2234	0.000126584	57.0003
Appendicular lean mass	rs10627558	CGT	C	6.91e-16	-0.0181	0.0022	0.2353	0.000117896	53.088
Appendicular lean mass	rs177591	G	C	1.51e-12	-0.0191	0.0027	0.1489	9.25e-05	41.6349
Appendicular lean mass	rs60408354	A	G	1.15e-12	0.0259	0.0036	0.0732	9.1e-05	40.9837
Appendicular lean mass	rs56363908	G	A	3.88e-16	-0.0382	0.0047	0.0422	0.000117963	53.1178
Appendicular lean mass	rs2140619	G	A	5.18e-09	0.0113	0.0019	0.4128	6.19e-05	27.8731
Appendicular lean mass	rs3778858	T	G	4.26e-08	0.0108	0.002	0.3698	5.44e-05	24.4789
Appendicular lean mass	rs822530	T	A	2.36e-27	0.0255	0.0024	0.7953	0.000211719	95.3446
Appendicular lean mass	rs12702693	T	C	6.56e-20	0.0173	0.0019	0.4542	0.000148389	66.8209
Appendicular lean mass	rs680882	G	T	1.98e-09	0.0133	0.0022	0.7606	6.44e-05	29.0059
Appendicular lean mass	rs723149	G	A	1.43e-47	-0.0276	0.0019	0.5628	0.000374871	168.846
Appendicular lean mass	rs1202186	T	C	1.65e-09	-0.012	0.002	0.6548	6.51e-05	29.312
Appendicular lean mass	rs9640283	C	G	4.53e-10	-0.0119	0.0019	0.5177	7.07e-05	31.8416
Appendicular lean mass	rs6977416	A	G	1.43e-113	0.0457	0.002	0.3338	0.000928867	418.603
Appendicular lean mass	rs10225945	G	A	3.28e-08	-0.0146	0.0026	0.1499	5.43e-05	24.4611
Appendicular lean mass	rs12700901	A	C	1.67e-21	-0.0184	0.0019	0.4055	0.000163233	73.5063
Appendicular lean mass	rs6593210	A	G	4.88e-10	0.0146	0.0024	0.2081	7.03e-05	31.634
Appendicular lean mass	rs11562101	T	A	9.39e-09	0.0115	0.002	0.4579	6.57e-05	29.5631
Appendicular lean mass	rs2188805	C	A	2e-08	0.0114	0.002	0.3359	5.8e-05	26.1068
Appendicular lean mass	rs76364830	A	G	2.7e-33	-0.0471	0.0039	0.0634	0.00026346	118.652
Appendicular lean mass	rs7826059	C	T	7.61e-09	0.0114	0.002	0.6421	5.97e-05	26.8952
Appendicular lean mass	rs1063582	G	T	1.12e-16	-0.0185	0.0022	0.7649	0.000123092	55.428
Appendicular lean mass	rs117818446	A	G	5.29e-10	0.0423	0.0068	0.0202	7.08e-05	31.8915
Appendicular lean mass	rs7014590	C	T	4.48e-26	-0.0228	0.0022	0.2614	0.000200731	90.3955
Appendicular lean mass	rs112537273	C	T	3.34e-21	-0.0212	0.0022	0.2299	0.000159143	71.6642
Appendicular lean mass	rs4602848	G	A	3.14e-15	0.016	0.002	0.6812	0.000111189	50.0675
Appendicular lean mass	rs35086476	GA	G	8.43e-09	0.0109	0.0019	0.4971	5.94e-05	26.7473
Appendicular lean mass	rs2142331	T	C	1.38e-17	-0.0165	0.0019	0.6023	0.000130427	58.7311
Appendicular lean mass	rs6470771	C	A	1.54e-26	-0.0268	0.0025	0.1694	0.000202118	91.0202
Appendicular lean mass	rs12334478	G	C	2.27e-17	-0.0161	0.0019	0.4964	0.000129598	58.358
Appendicular lean mass	rs10112506	G	A	5.76e-10	-0.012	0.0019	0.3898	6.85e-05	30.8448
Appendicular lean mass	rs7816345	T	C	6.22e-24	0.0255	0.0025	0.1682	0.000181951	81.9369
Appendicular lean mass	rs2923411	C	T	4.77e-11	0.0127	0.0019	0.5946	7.78e-05	35.0126
Appendicular lean mass	rs72656010	C	T	7.31e-126	-0.0668	0.0028	0.1322	0.00102385	461.449
Appendicular lean mass	rs7828086	C	T	1.11e-09	0.0135	0.0022	0.2391	6.63e-05	29.8592
Appendicular lean mass	rs62501195	C	A	8.11e-15	-0.0198	0.0025	0.1712	0.000111254	50.0965
Appendicular lean mass	rs62515437	T	G	8.79e-60	0.0369	0.0023	0.2253	0.000475311	214.106
Appendicular lean mass	rs2925155	T	C	5.47e-12	-0.015	0.0022	0.2612	8.68e-05	39.1017
Appendicular lean mass	rs1340022	C	T	4.47e-10	0.0118	0.0019	0.4868	6.96e-05	31.3261
Appendicular lean mass	rs72721979	G	T	2.2e-17	-0.0229	0.0027	0.143	0.000128534	57.8787
Appendicular lean mass	rs7007389	A	T	2.94e-11	-0.0134	0.002	0.3727	8.4e-05	37.8056
Appendicular lean mass	rs115105539	C	G	7.83e-20	0.0231	0.0025	0.1667	0.000148249	66.7575
Appendicular lean mass	rs4077103	A	C	4.18e-08	-0.0143	0.0026	0.8426	5.42e-05	24.4229
Appendicular lean mass	rs61729527	T	C	4.86e-16	-0.0346	0.0043	0.0519	0.000117816	53.0518
Appendicular lean mass	rs4735761	C	A	3.66e-56	0.0331	0.0021	0.2857	0.000447174	201.426
Appendicular lean mass	rs10283100	G	A	4.11e-44	0.0575	0.0041	0.9445	0.000346626	156.119
Appendicular lean mass	rs4870941	C	G	1.09e-39	-0.0297	0.0023	0.238	0.000319945	144.098
Appendicular lean mass	rs12541381	A	G	2.81e-49	-0.0319	0.0022	0.2575	0.000389121	175.267
Appendicular lean mass	rs10107388	C	T	6.95e-16	-0.0159	0.002	0.3691	0.000117741	53.0182
Appendicular lean mass	rs10815274	C	A	6.46e-11	0.0124	0.0019	0.4562	7.63e-05	34.3515
Appendicular lean mass	rs7858712	G	A	1.04e-24	0.0347	0.0034	0.9144	0.000188495	84.884
Appendicular lean mass	rs34522021	T	C	3.38e-11	0.0126	0.0019	0.4547	7.87e-05	35.4496
Appendicular lean mass	rs75508358	T	C	4.29e-09	0.0266	0.0045	0.0457	6.17e-05	27.7886
Appendicular lean mass	rs12347137	C	A	9.8e-85	-0.046	0.0024	0.2023	0.000682938	307.697
Appendicular lean mass	rs10123619	G	A	4.05e-11	-0.0171	0.0026	0.8425	7.76e-05	34.9423
Appendicular lean mass	rs10975935	G	A	4.15e-08	-0.0121	0.0022	0.2464	5.44e-05	24.4822
Appendicular lean mass	rs1056747	G	A	8.05e-16	-0.0155	0.0019	0.4117	0.000116379	52.4045
Appendicular lean mass	rs143554698	T	C	3.39e-21	-0.0257	0.0027	0.1409	0.000159901	72.0055
Appendicular lean mass	rs10982888	A	T	3.97e-28	-0.0328	0.003	0.1136	0.000216664	97.5719
Appendicular lean mass	rs73384223	C	T	1.27e-17	-0.0205	0.0024	0.1967	0.000132807	59.8029
Appendicular lean mass	rs7863102	T	A	9.97e-09	-0.011	0.0019	0.4474	5.98e-05	26.9397
Appendicular lean mass	rs3901421	C	G	7.55e-30	0.0215	0.0019	0.4871	0.000230971	104.017
Appendicular lean mass	rs2236406	C	T	1.26e-87	0.0394	0.002	0.3493	0.00070567	317.946
Appendicular lean mass	rs373966865	CA	C	1.84e-53	0.0389	0.0025	0.1758	0.000438511	197.522
Appendicular lean mass	rs3205136	A	C	1.85e-08	-0.0184	0.0033	0.0952	5.83e-05	26.2619
Appendicular lean mass	rs10858246	C	G	2.35e-20	-0.0188	0.002	0.3183	0.000153382	69.0697
Appendicular lean mass	rs1330826	C	G	1.04e-12	0.0162	0.0023	0.2268	9.2e-05	41.4457
Appendicular lean mass	rs74458759	G	C	3.12e-15	0.0171	0.0022	0.2886	0.000120069	54.0667
Appendicular lean mass	rs12340775	A	G	1.73e-11	-0.0287	0.0043	0.0552	8.59e-05	38.6861
Appendicular lean mass	rs12351226	T	C	9.13e-18	0.0218	0.0025	0.1712	0.000134864	60.7296
Appendicular lean mass	rs1341215	A	G	6.32e-17	0.0229	0.0027	0.1374	0.000124307	55.9753
Appendicular lean mass	rs12344515	T	C	2.28e-13	-0.0163	0.0022	0.2402	9.7e-05	43.6681
Appendicular lean mass	rs80280630	T	C	2.28e-08	-0.0168	0.003	0.1115	5.59e-05	25.1797
Appendicular lean mass	rs112367251	TCTCACA	T	1.29e-17	0.0179	0.0021	0.357	0.000147101	66.2406
Appendicular lean mass	rs10793931	C	G	3.23e-11	-0.0132	0.002	0.3555	7.98e-05	35.9518
Appendicular lean mass	rs7082659	C	T	2.27e-08	0.0156	0.0028	0.8663	5.64e-05	25.3833
Appendicular lean mass	rs10829226	A	G	1.33e-08	-0.0112	0.002	0.6359	5.81e-05	26.1545
Appendicular lean mass	rs10776560	T	C	7.88e-17	-0.0157	0.0019	0.4995	0.000123245	55.4967
Appendicular lean mass	rs68049170	A	G	2.69e-34	-0.0259	0.0021	0.2764	0.000268328	120.845
Appendicular lean mass	rs2274351	T	C	3.07e-19	0.017	0.0019	0.5433	0.000143416	64.5812
Appendicular lean mass	rs11421589	CT	C	5.99e-10	0.0119	0.0019	0.5556	6.99e-05	31.4873
Appendicular lean mass	rs11424084	CA	C	7.24e-17	0.0228	0.0027	0.1403	0.000125402	56.4682
Appendicular lean mass	rs1556659	T	C	7.19e-17	0.0163	0.002	0.3818	0.000125421	56.4767
Appendicular lean mass	rs35288270	C	T	3.43e-32	-0.0328	0.0028	0.1344	0.000250319	112.732
Appendicular lean mass	rs4748008	C	T	8.95e-11	-0.0125	0.0019	0.4346	7.68e-05	34.5759
Appendicular lean mass	rs332116	T	C	2.89e-22	-0.0206	0.0021	0.2804	0.000171251	77.1175
Appendicular lean mass	rs10822117	G	A	4.24e-15	-0.0176	0.0022	0.237	0.000112028	50.4454
Appendicular lean mass	rs10128333	T	C	9.51e-09	-0.0146	0.0025	0.1676	5.95e-05	26.7801
Appendicular lean mass	rs7095472	G	A	7.66e-45	0.0267	0.0019	0.5335	0.000354845	159.822
Appendicular lean mass	rs117335233	G	T	2.56e-08	-0.0236	0.0042	0.053	5.59e-05	25.1738
Appendicular lean mass	rs12773500	T	C	5.05e-10	0.0171	0.0028	0.1375	6.94e-05	31.2291
Appendicular lean mass	rs2181834	T	G	7.69e-41	0.0254	0.0019	0.5503	0.000319315	143.815
Appendicular lean mass	rs496783	G	A	8.13e-11	-0.0124	0.0019	0.4648	7.65e-05	34.4456
Appendicular lean mass	rs11198591	A	G	4.91e-14	0.0148	0.002	0.3684	0.000101933	45.8991
Appendicular lean mass	rs2362487	G	C	3.57e-12	0.0154	0.0022	0.2473	8.83e-05	39.7558
Appendicular lean mass	rs947099	A	G	2.71e-09	0.0117	0.002	0.3536	6.26e-05	28.1765
Appendicular lean mass	rs71463518	AT	A	2.92e-10	-0.0132	0.0021	0.319	7.57e-05	34.0874
Appendicular lean mass	rs10824307	C	G	1.79e-22	-0.0194	0.002	0.6471	0.000171892	77.4063
Appendicular lean mass	rs664317	C	A	4.5e-12	-0.0177	0.0026	0.8375	8.53e-05	38.397
Appendicular lean mass	rs2648725	A	T	8.2e-13	0.0165	0.0023	0.2134	9.14e-05	41.1558
Appendicular lean mass	rs7893378	A	G	2.36e-08	0.0175	0.0031	0.1143	6.2e-05	27.9197
Appendicular lean mass	rs291979	A	G	6.76e-27	0.0242	0.0023	0.2289	0.000206737	93.1005
Appendicular lean mass	rs11009928	G	A	1.04e-11	-0.0148	0.0022	0.2547	8.32e-05	37.4451
Appendicular lean mass	rs5786398	CT	C	1.54e-17	-0.0177	0.0021	0.3773	0.000147212	66.2905
Appendicular lean mass	rs4752689	A	G	1.36e-26	0.0205	0.0019	0.5839	0.000204209	91.9618
Appendicular lean mass	rs11014285	A	G	2.89e-40	0.0342	0.0026	0.1654	0.000322921	145.439
Appendicular lean mass	rs2490302	A	T	6.24e-11	0.0221	0.0034	0.9137	7.7e-05	34.6823
Appendicular lean mass	rs11191208	A	G	3.69e-10	0.0147	0.0024	0.2057	7.06e-05	31.795
Appendicular lean mass	rs10749157	C	T	1.24e-08	0.0113	0.002	0.3584	5.87e-05	26.4417
Appendicular lean mass	rs2283200	T	C	1.48e-11	-0.0281	0.0042	0.0559	8.33e-05	37.5278
Appendicular lean mass	rs73413540	T	C	4.42e-08	-0.0124	0.0023	0.2248	5.36e-05	24.1297
Appendicular lean mass	rs985136	G	C	2.96e-12	0.0138	0.002	0.4895	9.52e-05	42.8571
Appendicular lean mass	rs10796828	G	T	5.77e-15	0.0154	0.002	0.6348	0.000109961	49.5144
Appendicular lean mass	rs7902	G	A	5.22e-15	0.0149	0.0019	0.4469	0.000109753	49.4207
Appendicular lean mass	rs11221657	G	T	1.21e-10	0.0179	0.0028	0.1352	7.49e-05	33.737
Appendicular lean mass	rs10832963	G	T	9.23e-21	-0.0203	0.0022	0.7445	0.000156775	70.5977
Appendicular lean mass	rs704660	T	C	2.28e-15	0.0153	0.0019	0.4095	0.00011321	50.9778
Appendicular lean mass	rs11233117	G	C	1.74e-20	-0.0176	0.0019	0.4535	0.00015354	69.1408
Appendicular lean mass	rs73006226	A	C	2.23e-10	-0.0182	0.0029	0.1267	7.33e-05	33.0058
Appendicular lean mass	rs545104	C	T	8.08e-11	0.0127	0.002	0.6164	7.63e-05	34.3445
Appendicular lean mass	rs56207600	A	G	2.5e-10	0.0192	0.003	0.111	7.28e-05	32.7592
Appendicular lean mass	rs61878760	A	G	3.74e-08	0.019	0.0034	0.0828	5.48e-05	24.6888
Appendicular lean mass	rs7952436	T	C	1.62e-39	-0.0453	0.0034	0.0823	0.000309975	139.607
Appendicular lean mass	rs4244809	A	G	5.55e-29	-0.0262	0.0023	0.2082	0.000226323	101.923
Appendicular lean mass	rs1584011	G	T	9.78e-16	0.0159	0.002	0.3559	0.000115906	52.1916
Appendicular lean mass	rs7941305	C	T	6.01e-10	-0.0129	0.0021	0.3133	7.16e-05	32.2413
Appendicular lean mass	rs11605297	A	G	8.03e-11	0.0146	0.0022	0.2328	7.61e-05	34.2851
Appendicular lean mass	rs7129320	A	G	7.29e-53	-0.0389	0.0025	0.1661	0.000419192	188.816
Appendicular lean mass	rs34345560	A	G	7.1e-20	0.0219	0.0024	0.1952	0.000150691	67.8573
Appendicular lean mass	rs11042717	C	T	4.04e-53	-0.029	0.0019	0.4896	0.000420318	189.324
Appendicular lean mass	rs10657263	G	C	7.98e-12	-0.013	0.0019	0.5481	8.37e-05	37.6964
Appendicular lean mass	rs4938359	G	A	3.24e-11	-0.0156	0.0024	0.2024	7.86e-05	35.3797
Appendicular lean mass	rs11217863	A	G	1.06e-19	-0.0268	0.003	0.1162	0.000147523	66.4307
Appendicular lean mass	rs772222	G	A	1.55e-08	0.0121	0.0021	0.2651	5.7e-05	25.6867
Appendicular lean mass	rs1168768	T	C	3.61e-08	0.0332	0.006	0.975	5.37e-05	24.1946
Appendicular lean mass	rs2089111	G	C	1.73e-15	-0.0172	0.0022	0.267	0.000115798	52.1432
Appendicular lean mass	rs3764002	T	C	4.47e-39	0.028	0.0021	0.2617	0.000302958	136.446
Appendicular lean mass	rs12423821	C	T	1.17e-09	0.0161	0.0027	0.1575	6.88e-05	30.9747
Appendicular lean mass	rs7137546	T	A	9.71e-14	0.0142	0.0019	0.4249	9.85e-05	44.3736
Appendicular lean mass	rs67551338	T	C	1.04e-47	0.0576	0.004	0.0615	0.000382987	172.503
Appendicular lean mass	rs10845408	T	C	3.25e-38	0.0255	0.002	0.3538	0.000297328	133.909
Appendicular lean mass	rs17478946	G	A	9.98e-21	-0.0192	0.0021	0.3004	0.000154947	69.7741
Appendicular lean mass	rs12230946	A	G	1.45e-16	0.0271	0.0033	0.0911	0.000121619	54.7647
Appendicular lean mass	rs2229840	T	C	3.02e-40	0.0341	0.0026	0.1597	0.000312089	140.559
Appendicular lean mass	rs7485647	A	G	1.04e-23	-0.0261	0.0026	0.844	0.000179382	80.7795
Appendicular lean mass	rs35756741	T	C	5.8e-31	-0.0378	0.0033	0.0924	0.000239651	107.927
Appendicular lean mass	rs6582398	T	C	1.14e-12	0.014	0.002	0.6002	9.41e-05	42.3556
Appendicular lean mass	rs10748128	T	G	6.77e-38	0.0255	0.002	0.3446	0.000293719	132.283
Appendicular lean mass	rs11178643	T	A	4.44e-08	0.0109	0.002	0.3593	5.47e-05	24.63
Appendicular lean mass	rs310796	T	G	2.53e-12	0.0142	0.002	0.6811	8.76e-05	39.4417
Appendicular lean mass	rs9634212	A	C	8.59e-95	0.0471	0.0023	0.221	0.000763838	344.174
Appendicular lean mass	rs7971536	A	T	1.06e-24	-0.0194	0.0019	0.4945	0.000188157	84.732
Appendicular lean mass	rs2454390	C	T	1.74e-11	-0.0176	0.0026	0.8459	8.08e-05	36.3628
Appendicular lean mass	rs11612462	G	T	2.55e-09	0.015	0.0025	0.1698	6.34e-05	28.5631
Appendicular lean mass	rs34338597	G	A	7.88e-09	-0.0112	0.0019	0.3832	5.93e-05	26.6997
Appendicular lean mass	rs610694	C	T	4.29e-13	0.0136	0.0019	0.4903	9.24e-05	41.6265
Appendicular lean mass	rs11175919	A	G	3.16e-09	0.0349	0.0059	0.0262	6.22e-05	27.9849
Appendicular lean mass	rs11068230	G	C	9.67e-18	0.0238	0.0028	0.8656	0.000131795	59.3475
Appendicular lean mass	rs2101017	T	C	1.44e-15	-0.0223	0.0028	0.8695	0.000112855	50.8176
Appendicular lean mass	rs11060942	A	G	7.49e-12	-0.0354	0.0052	0.0344	8.33e-05	37.4864
Appendicular lean mass	rs3782811	A	C	3.96e-14	-0.0165	0.0022	0.2507	0.000102284	46.0572
Appendicular lean mass	rs61919240	A	T	9.77e-12	0.0137	0.002	0.3244	8.23e-05	37.0444
Appendicular lean mass	rs1444628	T	C	6.85e-32	0.024	0.002	0.6904	0.000246238	110.894
Appendicular lean mass	rs11049704	G	C	1.1e-18	-0.0183	0.0021	0.293	0.000138746	62.4776
Appendicular lean mass	rs12831751	C	A	1.57e-16	0.0172	0.0021	0.2857	0.000120747	54.372
Appendicular lean mass	rs12099669	A	G	1.39e-58	0.0331	0.002	0.6962	0.000463455	208.763
Appendicular lean mass	rs3782232	A	G	2.41e-20	-0.0339	0.0037	0.0712	0.000151996	68.4451
Appendicular lean mass	rs7301341	C	T	9.27e-37	-0.0255	0.002	0.3268	0.000286112	128.856
Appendicular lean mass	rs7321635	C	A	2.58e-11	-0.0132	0.002	0.6465	7.96e-05	35.8604
Appendicular lean mass	rs3116602	G	T	9.53e-155	-0.0612	0.0023	0.2153	0.00126555	570.526
Appendicular lean mass	rs3818416	C	A	2.01e-35	0.0279	0.0022	0.7645	0.000280289	126.233
Appendicular lean mass	rs61944841	A	G	3.54e-37	0.0253	0.002	0.4138	0.000310533	139.858
Appendicular lean mass	rs77013652	G	T	1.5e-09	0.049	0.0081	0.015	7.09e-05	31.9467
Appendicular lean mass	rs7328187	G	T	1.19e-09	0.0116	0.0019	0.4976	6.73e-05	30.2936
Appendicular lean mass	rs7320878	A	G	1.34e-14	-0.015	0.0019	0.6034	0.000107689	48.4911
Appendicular lean mass	rs144109601	A	C	5.15e-09	-0.0278	0.0048	0.0418	6.19e-05	27.8756
Appendicular lean mass	rs9590328	G	A	2.02e-08	0.0153	0.0027	0.1417	5.69e-05	25.6384
Appendicular lean mass	rs78525785	T	C	9.81e-18	-0.0169	0.002	0.62	0.000134579	60.6013
Appendicular lean mass	rs9594714	T	G	2.65e-12	0.0144	0.0021	0.3052	8.79e-05	39.5988
Appendicular lean mass	rs9568031	T	C	3.34e-08	-0.0115	0.0021	0.706	5.49e-05	24.7199
Appendicular lean mass	rs2812208	C	G	5.51e-68	0.1156	0.0066	0.021	0.000549475	247.532
Appendicular lean mass	rs8000973	C	T	2.05e-12	0.0134	0.0019	0.5334	8.94e-05	40.2459
Appendicular lean mass	rs9525326	G	A	3.62e-14	-0.0184	0.0024	0.1875	0.000103155	46.4494
Appendicular lean mass	rs532499	C	T	4.9e-09	-0.0127	0.0022	0.7413	6.19e-05	27.8548
Appendicular lean mass	rs9517483	G	A	2.26e-18	-0.0181	0.0021	0.699	0.000137858	62.0777
Appendicular lean mass	rs2296316	C	T	1.59e-23	-0.0192	0.0019	0.4643	0.00018338	82.5805
Appendicular lean mass	rs113827862	C	T	4.67e-09	-0.0235	0.004	0.0608	6.31e-05	28.3988
Appendicular lean mass	rs4900578	T	A	1.76e-19	-0.0177	0.002	0.3688	0.000145859	65.6815
Appendicular lean mass	rs56112295	T	C	1.12e-10	0.0154	0.0024	0.2257	8.29e-05	37.3244
Appendicular lean mass	rs8019890	A	C	1.96e-38	0.025	0.0019	0.5313	0.000311275	140.193
Appendicular lean mass	rs8017006	G	A	2.22e-09	0.0122	0.002	0.3275	6.56e-05	29.5207
Appendicular lean mass	rs10483727	C	T	6.73e-80	-0.0368	0.0019	0.6109	0.000643809	290.056
Appendicular lean mass	rs8020095	A	G	4.53e-08	-0.0145	0.0027	0.15	5.36e-05	24.1404
Appendicular lean mass	rs35230100	CATAT	C	4.42e-40	-0.0262	0.002	0.4328	0.00033702	151.792
Appendicular lean mass	rs117068593	T	C	8.83e-62	0.0403	0.0024	0.1895	0.000498887	224.732
Appendicular lean mass	rs1190540	G	A	1.62e-09	0.0125	0.0021	0.6983	6.58e-05	29.6443
Appendicular lean mass	rs17197114	C	T	1.54e-12	0.0177	0.0025	0.1772	9.14e-05	41.1357
Appendicular lean mass	rs45528934	T	C	1.97e-24	0.0262	0.0026	0.1623	0.000186655	84.0554
Appendicular lean mass	rs28529055	T	G	1.88e-14	-0.0147	0.0019	0.4368	0.000106319	47.8742
Appendicular lean mass	rs36226649	C	T	3.05e-37	0.0485	0.0038	0.0667	0.00029286	131.896
Appendicular lean mass	rs8904	A	G	1.52e-15	-0.0157	0.002	0.363	0.000113992	51.3298
Appendicular lean mass	rs10637890	TTC	T	3.96e-10	-0.0123	0.002	0.621	7.12e-05	32.0662
Appendicular lean mass	rs2070598	A	G	6.36e-27	0.0204	0.0019	0.4559	0.000206461	92.9765
Appendicular lean mass	rs909220	A	G	3.24e-15	-0.015	0.0019	0.4443	0.000111104	50.0291
Appendicular lean mass	rs79066296	T	C	6.11e-14	-0.0169	0.0022	0.7676	0.0001019	45.8843
Appendicular lean mass	rs12882130	G	C	1.88e-24	-0.0202	0.002	0.3836	0.000192963	86.8966
Appendicular lean mass	rs8018486	G	A	1.18e-08	-0.0138	0.0024	0.1914	5.89e-05	26.5421
Appendicular lean mass	rs7144307	C	T	6.1e-10	-0.0122	0.002	0.3853	7.05e-05	31.7459
Appendicular lean mass	rs13316	A	C	3.66e-09	0.0115	0.0019	0.4301	6.48e-05	29.1922
Appendicular lean mass	rs147233090	T	C	3.95e-13	-0.0446	0.0061	0.0247	9.58e-05	43.154
Appendicular lean mass	rs5812543	GT	G	2.65e-10	0.0135	0.0021	0.6915	7.78e-05	35.0125
Appendicular lean mass	rs4383083	A	G	2.91e-08	0.0111	0.002	0.6466	5.63e-05	25.3541
Appendicular lean mass	rs8042578	G	C	2.29e-38	0.0287	0.0022	0.2426	0.000302698	136.328
Appendicular lean mass	rs990315	C	T	5.07e-09	-0.0115	0.002	0.6229	6.21e-05	27.9752
Appendicular lean mass	rs74379684	T	C	4.39e-14	-0.0272	0.0036	0.0751	0.000102779	46.2799
Appendicular lean mass	rs2871865	G	C	3.4e-62	-0.0493	0.003	0.1159	0.000498091	224.373
Appendicular lean mass	rs17205463	T	C	4.21e-43	-0.0263	0.0019	0.4477	0.000342061	154.063
Appendicular lean mass	rs36016415	AC	A	3.22e-47	-0.0275	0.0019	0.5397	0.000375741	169.238
Appendicular lean mass	rs4965298	T	C	1.81e-08	-0.0119	0.0021	0.7127	5.8e-05	26.1118
Appendicular lean mass	rs11070842	C	T	1.3e-08	-0.0146	0.0026	0.1631	5.82e-05	26.2019
Appendicular lean mass	rs12907139	A	G	4.89e-15	-0.0149	0.0019	0.5245	0.000110738	49.8645
Appendicular lean mass	rs5742915	C	T	9.33e-39	0.0248	0.0019	0.4605	0.000305601	137.636
Appendicular lean mass	rs140657345	TCCTC	T	5.53e-20	-0.02	0.0022	0.2519	0.000150757	67.8873
Appendicular lean mass	rs373736365	G	T	4.53e-18	0.0189	0.0022	0.7157	0.000145366	65.459
Appendicular lean mass	rs11633371	T	G	7.49e-30	0.0216	0.0019	0.4764	0.00023276	104.823
Appendicular lean mass	rs4932439	G	A	1.43e-09	-0.0151	0.0025	0.8254	6.57e-05	29.5914
Appendicular lean mass	rs2174008	C	G	5.89e-24	-0.0192	0.0019	0.4975	0.000184315	83.0016
Appendicular lean mass	rs577289	T	A	5.39e-09	-0.0125	0.0021	0.2808	6.31e-05	28.4164
Appendicular lean mass	rs72726050	C	T	1.84e-08	-0.0192	0.0034	0.0958	6.39e-05	28.7564
Appendicular lean mass	rs12909863	C	G	6.05e-18	0.0189	0.0022	0.2512	0.000134381	60.5121
Appendicular lean mass	rs713467	A	G	3.09e-14	0.0146	0.0019	0.4345	0.000104751	47.1681
Appendicular lean mass	rs11629593	G	T	4.42e-08	-0.0109	0.002	0.6158	5.62e-05	25.3133
Appendicular lean mass	rs2663126	A	G	1.36e-11	-0.0139	0.0021	0.6905	8.26e-05	37.1847
Appendicular lean mass	rs116092985	G	A	1.17e-34	-0.0401	0.0033	0.0958	0.000278579	125.463
Appendicular lean mass	rs35811052	G	A	8.84e-12	-0.0148	0.0022	0.2559	8.34e-05	37.5609
Appendicular lean mass	rs62033029	A	G	1.73e-09	-0.0141	0.0023	0.2064	6.51e-05	29.326
Appendicular lean mass	rs72801843	A	T	8.83e-52	0.0313	0.0021	0.3015	0.000412641	185.865
Appendicular lean mass	rs17818592	C	T	1.23e-11	-0.0129	0.0019	0.4367	8.19e-05	36.8649
Appendicular lean mass	rs8054549	A	C	3.37e-39	-0.0251	0.0019	0.4486	0.000311676	140.373
Appendicular lean mass	rs7185244	C	T	1.4e-10	-0.0148	0.0023	0.7759	7.62e-05	34.2988
Appendicular lean mass	rs113478686	CT	C	3.76e-27	-0.0244	0.0023	0.2292	0.000210361	94.7332
Appendicular lean mass	rs12051245	C	T	2.56e-40	0.0299	0.0022	0.2318	0.000318391	143.398
Appendicular lean mass	rs143076454	A	G	1.06e-12	-0.0499	0.007	0.0186	9.09e-05	40.9331
Appendicular lean mass	rs246177	T	C	2.04e-27	0.0214	0.002	0.3681	0.000213045	95.9421
Appendicular lean mass	rs116008080	A	G	4.06e-11	-0.0415	0.0063	0.0238	8e-05	36.0348
Appendicular lean mass	rs12926103	A	G	9.6e-13	0.0272	0.0038	0.0661	9.13e-05	41.1296
Appendicular lean mass	rs77364196	A	G	8.35e-15	-0.033	0.0043	0.053	0.000109316	49.2239
Appendicular lean mass	rs61528919	C	T	3.33e-12	0.014	0.002	0.3609	9.04e-05	40.7123
Appendicular lean mass	rs35816944	A	G	1.27e-20	-0.1088	0.0117	0.0066	0.000155223	69.8986
Appendicular lean mass	rs78457529	T	C	1.22e-24	-0.0904	0.0088	0.0117	0.000188991	85.1077
Appendicular lean mass	rs77809369	T	C	9.83e-10	0.0237	0.0039	0.0642	6.75e-05	30.3892
Appendicular lean mass	rs35268848	A	C	2.83e-13	0.0737	0.0101	0.0119	0.000127736	57.5193
Appendicular lean mass	rs62070319	T	C	2.54e-20	-0.018	0.002	0.4427	0.000159872	71.9926
Appendicular lean mass	rs6502935	T	C	6.31e-09	-0.0125	0.0022	0.7381	6.04e-05	27.2002
Appendicular lean mass	rs113146332	C	G	2.99e-10	0.0311	0.0049	0.0381	7.09e-05	31.9214
Appendicular lean mass	rs2005172	C	A	2.35e-128	0.048	0.002	0.6397	0.00106207	478.696
Appendicular lean mass	rs28485212	T	C	1.24e-12	-0.0188	0.0027	0.1494	8.98e-05	40.4488
Appendicular lean mass	rs9890062	A	G	1.2e-11	0.0267	0.0039	0.0615	8.23e-05	37.0546
Appendicular lean mass	rs117972846	G	T	5.47e-09	0.0335	0.0057	0.0285	6.21e-05	27.982
Appendicular lean mass	rs2289629	A	G	8.02e-14	-0.0148	0.002	0.3451	9.9e-05	44.5822
Appendicular lean mass	rs2019203	A	C	1.84e-23	0.0189	0.0019	0.4909	0.000178546	80.403
Appendicular lean mass	rs9905385	G	A	1.94e-63	-0.0339	0.002	0.6707	0.000507633	228.673
Appendicular lean mass	rs78766798	C	T	2.61e-20	0.0319	0.0035	0.0847	0.000157782	71.0513
Appendicular lean mass	rs2676298	T	C	2.39e-23	-0.0269	0.0027	0.853	0.000181468	81.7193
Appendicular lean mass	rs7220127	C	T	4.6e-08	-0.0105	0.0019	0.4264	5.39e-05	24.2831
Appendicular lean mass	rs36000545	G	A	2.56e-29	-0.022	0.002	0.3957	0.00023147	104.241
Appendicular lean mass	rs6505216	T	G	1.83e-101	-0.0498	0.0023	0.233	0.000886421	399.457
Appendicular lean mass	rs57791149	C	T	3.26e-19	-0.0173	0.0019	0.4024	0.000143943	64.8184
Appendicular lean mass	rs2521349	A	G	2.01e-15	0.0155	0.0019	0.3847	0.000113737	51.215
Appendicular lean mass	rs173135	T	C	3.25e-30	-0.0341	0.003	0.115	0.00023669	106.593
Appendicular lean mass	rs12943867	A	G	7.57e-20	0.0184	0.002	0.3367	0.000151223	68.0972
Appendicular lean mass	rs9898189	G	C	1.88e-15	-0.0163	0.0021	0.6446	0.000121734	54.8164
Appendicular lean mass	rs57513571	T	C	7.02e-16	-0.0191	0.0024	0.2004	0.000116914	52.6457
Appendicular lean mass	rs11867855	T	G	2.93e-09	-0.0132	0.0022	0.2372	6.31e-05	28.3907
Appendicular lean mass	rs72829852	T	C	3.74e-15	0.0309	0.0039	0.0621	0.000111223	50.0828
Appendicular lean mass	rs2592208	A	C	5.52e-11	-0.0124	0.0019	0.513	7.68e-05	34.5938
Appendicular lean mass	rs113232639	A	G	4.79e-64	0.0327	0.0019	0.493	0.00053454	240.801
Appendicular lean mass	rs8084413	A	G	3.25e-11	-0.0127	0.0019	0.4693	8.03e-05	36.1757
Appendicular lean mass	rs2978362	T	C	2.85e-08	0.0106	0.0019	0.5326	5.59e-05	25.1884
Appendicular lean mass	rs71336393	GA	G	9.02e-105	0.049	0.0023	0.2346	0.000862261	388.56
Appendicular lean mass	rs74494415	T	C	1.82e-17	-0.0417	0.0049	0.0398	0.000132907	59.848
Appendicular lean mass	rs2347808	A	G	5.79e-11	-0.0125	0.0019	0.5139	7.81e-05	35.1506
Appendicular lean mass	rs33973388	T	G	1.45e-38	0.0249	0.0019	0.4353	0.000304814	137.282
Appendicular lean mass	rs4940874	G	A	1.24e-09	0.0148	0.0024	0.8119	6.69e-05	30.1244
Appendicular lean mass	rs1786263	T	G	1.03e-22	-0.019	0.0019	0.6055	0.000172464	77.6637
Appendicular lean mass	rs62103240	A	G	1.4e-08	0.0212	0.0037	0.071	5.93e-05	26.696
Appendicular lean mass	rs4121583	T	C	4.62e-09	0.0118	0.002	0.6192	6.57e-05	29.5662
Appendicular lean mass	rs568267	T	C	2.23e-08	0.0122	0.0022	0.7431	5.68e-05	25.5877
Appendicular lean mass	rs35073631	C	T	5.92e-09	0.0112	0.0019	0.4331	6.16e-05	27.7353
Appendicular lean mass	rs12962050	A	G	1.52e-14	0.0153	0.002	0.6445	0.000107269	48.3022
Appendicular lean mass	rs7228151	C	T	3.19e-15	-0.0185	0.0023	0.206	0.00011196	50.4144
Appendicular lean mass	rs9957318	G	A	1.02e-20	0.0187	0.002	0.348	0.000158687	71.4585
Appendicular lean mass	rs151123488	CTGTGTGTGTG	C	5.07e-10	0.0178	0.0029	0.8668	7.32e-05	32.9435
Appendicular lean mass	rs60389750	T	C	1.06e-16	-0.0175	0.0021	0.3139	0.000131912	59.4001
Appendicular lean mass	rs79441499	T	C	9.67e-13	-0.0138	0.0019	0.4055	9.18e-05	41.3443
Appendicular lean mass	rs11373507	GA	G	1.12e-08	-0.0113	0.002	0.6294	5.96e-05	26.8219
Appendicular lean mass	rs45474992	T	C	2.17e-33	-0.0617	0.0051	0.0362	0.000265641	119.634
Appendicular lean mass	rs10421750	T	G	5.73e-12	-0.0145	0.0021	0.312	9.03e-05	40.6437
Appendicular lean mass	rs16989695	A	G	1.93e-13	-0.0139	0.0019	0.5165	9.65e-05	43.4524
Appendicular lean mass	rs12150907	A	G	7.22e-20	-0.0219	0.0024	0.1977	0.000152146	68.513
Appendicular lean mass	rs2607234	G	A	2e-12	-0.0302	0.0043	0.9476	9.06e-05	40.7835
Appendicular lean mass	rs117203652	A	G	4.32e-10	-0.0346	0.0055	0.03	6.97e-05	31.3726
Appendicular lean mass	rs4807472	C	T	8.18e-15	-0.0158	0.002	0.6764	0.000109284	49.2095
Appendicular lean mass	rs116919274	A	G	3.52e-09	0.0271	0.0046	0.046	6.45e-05	29.0234
Appendicular lean mass	rs75702986	A	G	3.14e-11	-0.0163	0.0025	0.1861	8.05e-05	36.2412
Appendicular lean mass	rs4252548	T	C	2.96e-31	-0.0753	0.0065	0.0218	0.000241827	108.907
Appendicular lean mass	rs8112948	A	T	4.24e-42	-0.0297	0.0022	0.2856	0.00035995	162.123
Appendicular lean mass	rs11260035	A	G	1.86e-12	0.015	0.0021	0.2761	8.99e-05	40.4987
Appendicular lean mass	rs11672848	T	C	7.73e-19	-0.0171	0.0019	0.5246	0.000145851	65.6777
Appendicular lean mass	rs147110934	T	G	9.39e-32	-0.0722	0.0062	0.0243	0.000247188	111.322
Appendicular lean mass	rs73125634	T	G	5.11e-20	-0.0195	0.0021	0.2782	0.000152712	68.7677
Appendicular lean mass	rs12185775	C	G	3.66e-08	-0.0167	0.003	0.1172	5.77e-05	25.985
Appendicular lean mass	rs112021215	C	T	5.99e-09	-0.0147	0.0025	0.201	6.94e-05	31.2524
Appendicular lean mass	rs4815952	C	T	1.24e-16	-0.0161	0.0019	0.5221	0.000129352	58.247
Appendicular lean mass	rs35963161	A	G	7.46e-16	-0.0157	0.0019	0.4757	0.000122954	55.3657
Appendicular lean mass	rs2236096	C	T	1.29e-15	0.018	0.0023	0.2327	0.000115701	52.0993
Appendicular lean mass	rs143384	G	A	1e-200	0.0725	0.0019	0.4038	0.00253084	1142.38
Appendicular lean mass	rs80132799	T	C	1.31e-09	0.0231	0.0038	0.0679	6.75e-05	30.4131
Appendicular lean mass	rs6054491	G	C	2.15e-10	-0.0142	0.0022	0.2404	7.36e-05	33.1591
Appendicular lean mass	rs684905	T	C	7.1e-10	-0.0118	0.0019	0.4176	6.77e-05	30.4965
Appendicular lean mass	rs6082354	C	A	1.19e-32	-0.024	0.002	0.6675	0.000255679	115.147
Appendicular lean mass	rs4287835	C	T	9.94e-15	0.0147	0.0019	0.534	0.000107545	48.4266
Appendicular lean mass	rs1291114	C	G	1.95e-08	0.0173	0.0031	0.8903	5.85e-05	26.323
Appendicular lean mass	rs57696574	C	A	4.5e-18	0.0173	0.002	0.3981	0.00014343	64.5871
Appendicular lean mass	rs34879158	C	A	1.55e-63	-0.0363	0.0022	0.263	0.000510818	230.109
Appendicular lean mass	rs6028716	A	G	4.58e-22	-0.021	0.0022	0.2587	0.000169145	76.1689
Appendicular lean mass	rs6066122	G	C	1.76e-08	0.0127	0.0023	0.7631	5.83e-05	26.2576
Appendicular lean mass	rs13037813	C	T	1.71e-39	0.0292	0.0022	0.2391	0.000310244	139.728
Appendicular lean mass	rs73197345	A	T	3.55e-14	0.0211	0.0028	0.1367	0.000105081	47.3169
Appendicular lean mass	rs12483401	C	T	9.22e-09	-0.0387	0.0067	0.0216	6.33e-05	28.5033
Appendicular lean mass	rs2230033	A	G	3.49e-43	-0.0265	0.0019	0.5644	0.0003453	155.522
Appendicular lean mass	rs112153300	A	G	7.05e-15	0.0261	0.0034	0.089	0.000110464	49.7408
Appendicular lean mass	rs35631698	GC	G	2.59e-13	0.0145	0.002	0.3746	9.85e-05	44.3588
Appendicular lean mass	rs2212926	A	C	7.75e-21	-0.022	0.0023	0.2106	0.000160928	72.4679
Appendicular lean mass	rs4818280	T	C	2.84e-10	-0.0124	0.002	0.6269	7.19e-05	32.3872
Appendicular lean mass	rs9610447	T	C	5.29e-12	0.0152	0.0022	0.7471	8.73e-05	39.3122
Appendicular lean mass	rs5753518	A	G	5.04e-13	0.0242	0.0033	0.0899	9.58e-05	43.1515
Appendicular lean mass	rs7286917	G	A	5.18e-14	0.0171	0.0023	0.7461	0.000110785	49.8856
Appendicular lean mass	rs41311445	C	A	4.73e-24	-0.0328	0.0032	0.0958	0.000186384	83.9332
Appendicular lean mass	rs5763821	C	A	1.06e-21	0.0191	0.002	0.3907	0.000173689	78.2153
Appendicular lean mass	rs6000886	C	T	5.88e-11	0.0131	0.002	0.6482	7.83e-05	35.2417
Appendicular lean mass	rs8136517	C	T	6.58e-12	0.0267	0.0039	0.0652	8.69e-05	39.1293
Appendicular lean mass	rs165849	A	G	4.57e-14	0.0157	0.0021	0.6975	0.000104016	46.837
Appendicular lean mass	rs10453441	G	A	9.1e-13	-0.0139	0.002	0.402	9.29e-05	41.8285
Appendicular lean mass	rs28379706	C	T	4.49e-09	0.0114	0.002	0.3931	6.2e-05	27.9211

## Sheet: Supplementary Table 2
exposure	SNP	effect_allele.exposure	other_allele.exposure	pval.exposure	beta.exposure	se.exposure	eaf.exposure	R2	F
Hand grip strength (left)	rs6680160	G	A	6e-11	0.0100686	0.00153878	0.628066	4.74e-05	21.8365
Hand grip strength (left)	rs7516571	G	A	3.1e-08	0.00937798	0.00169361	0.259017	3.38e-05	15.5641
Hand grip strength (left)	rs150330307	C	T	2.9e-13	-0.0307753	0.0042167	0.031896	5.85e-05	26.9676
Hand grip strength (left)	rs2800789	C	A	3.1e-08	0.00826025	0.00149261	0.480339	3.41e-05	15.7044
Hand grip strength (left)	rs1044299	T	C	6.6e-21	0.01401	0.00149362	0.546046	9.73e-05	44.8656
Hand grip strength (left)	rs11121542	A	G	3e-12	-0.0157601	0.00225916	0.122677	5.35e-05	24.65
Hand grip strength (left)	rs4121165	A	G	3.4e-10	-0.0114169	0.00181868	0.211447	4.35e-05	20.0402
Hand grip strength (left)	rs58670122	G	A	3.6e-08	-0.0118148	0.00214462	0.143159	3.42e-05	15.7885
Hand grip strength (left)	rs10788958	G	C	1e-19	0.0141976	0.00156276	0.644753	9.23e-05	42.5743
Hand grip strength (left)	rs4335354	A	C	4.6e-09	-0.00939409	0.00160262	0.315536	3.81e-05	17.5743
Hand grip strength (left)	rs1884447	A	G	2.3e-08	0.00846069	0.00151391	0.400566	3.44e-05	15.8488
Hand grip strength (left)	rs61818100	C	T	6.2e-09	0.0134422	0.00231335	0.116595	3.72e-05	17.1613
Hand grip strength (left)	rs823130	T	C	4.4e-14	-0.0113317	0.00150098	0.432903	6.3e-05	29.0683
Hand grip strength (left)	rs11204664	C	T	8.1e-09	-0.00865184	0.00150032	0.578725	3.65e-05	16.8277
Hand grip strength (left)	rs6689375	T	A	5.3e-17	-0.0160169	0.00191158	0.185489	7.75e-05	35.7404
Hand grip strength (left)	rs6433478	C	T	1.5e-09	0.00905674	0.00149951	0.544228	4.07e-05	18.7605
Hand grip strength (left)	rs12473732	T	C	1.4e-13	0.0109869	0.00148601	0.486507	6.03e-05	27.807
Hand grip strength (left)	rs7571789	C	T	3e-18	0.0129539	0.001487	0.522782	8.37e-05	38.6037
Hand grip strength (left)	rs7575451	G	C	3.8e-10	-0.00973095	0.00155349	0.649752	4.31e-05	19.8704
Hand grip strength (left)	rs1434095	C	T	5.3e-10	0.0140301	0.00225906	0.875121	4.3e-05	19.8359
Hand grip strength (left)	rs17630248	C	T	4.1e-09	-0.009184	0.00156162	0.347808	3.83e-05	17.642
Hand grip strength (left)	rs1981612	A	C	1e-09	0.00922755	0.00151053	0.45601	4.22e-05	19.4765
Hand grip strength (left)	rs1641457	G	T	1.4e-11	0.0120456	0.0017829	0.223305	5.03e-05	23.205
Hand grip strength (left)	rs3819121	C	T	2.9e-20	0.0140963	0.00152872	0.368945	9.25e-05	42.6612
Hand grip strength (left)	rs10176878	C	T	8.6e-12	-0.0129478	0.0018962	0.190861	5.18e-05	23.8731
Hand grip strength (left)	rs61286123	C	T	1.2e-08	-0.0101041	0.00177111	0.227916	3.59e-05	16.5655
Hand grip strength (left)	rs34030812	C	T	4.1e-11	-0.0101679	0.00154042	0.367365	4.81e-05	22.1558
Hand grip strength (left)	rs10205394	C	G	1.1e-09	-0.0113217	0.00185667	0.200728	4.11e-05	18.9626
Hand grip strength (left)	rs9866627	A	C	5.7e-09	-0.0155989	0.00267761	0.084376	3.76e-05	17.3338
Hand grip strength (left)	rs112485536	T	C	9.4e-09	0.0161779	0.00281803	0.075507	3.65e-05	16.8463
Hand grip strength (left)	rs62253653	G	A	5.5e-11	0.0106985	0.00163146	0.295379	4.76e-05	21.9662
Hand grip strength (left)	rs6802071	T	C	3.8e-10	-0.00940386	0.00150182	0.434928	4.35e-05	20.0404
Hand grip strength (left)	rs71298370	A	G	3.8e-08	0.0148764	0.00270414	0.086241	3.49e-05	16.0809
Hand grip strength (left)	rs13091492	G	A	3.3e-08	-0.00847903	0.00153407	0.372833	3.36e-05	15.5009
Hand grip strength (left)	rs10934857	A	G	4.8e-08	0.00928675	0.00170182	0.258913	3.31e-05	15.2587
Hand grip strength (left)	rs4498020	A	C	4.3e-10	-0.0104238	0.00166995	0.723767	4.34e-05	20.0308
Hand grip strength (left)	rs4677601	G	A	1.1e-09	0.00905884	0.001485	0.510324	4.1e-05	18.9091
Hand grip strength (left)	rs2871960	C	A	5.5e-16	0.0120879	0.00149222	0.444681	7.22e-05	33.2719
Hand grip strength (left)	rs35609019	C	G	7.7e-10	0.00947689	0.00154061	0.397748	4.3e-05	19.8376
Hand grip strength (left)	rs56338231	G	A	1.7e-10	-0.010847	0.00169739	0.258266	4.51e-05	20.783
Hand grip strength (left)	rs34587452	C	G	3.2e-10	-0.0113642	0.00180741	0.21517	4.36e-05	20.1098
Hand grip strength (left)	rs13106087	C	T	3.9e-09	0.0116202	0.00197399	0.829801	3.81e-05	17.5844
Hand grip strength (left)	rs997850	C	G	6.3e-09	-0.00887326	0.0015279	0.60474	3.76e-05	17.3535
Hand grip strength (left)	rs34722008	A	G	3.3e-08	0.00858569	0.00155452	0.353332	3.37e-05	15.5304
Hand grip strength (left)	rs2850379	A	C	3.3e-08	-0.00828995	0.00150007	0.432305	3.37e-05	15.5517
Hand grip strength (left)	rs75497896	C	T	9.1e-10	-0.0206727	0.00337524	0.051006	4.14e-05	19.0744
Hand grip strength (left)	rs116409670	T	C	2.6e-08	-0.0152418	0.00273867	0.079819	3.41e-05	15.7333
Hand grip strength (left)	rs55681913	C	T	1.6e-08	0.0137738	0.00243658	0.106095	3.6e-05	16.5906
Hand grip strength (left)	rs13356200	G	T	9.7e-09	-0.00876765	0.0015286	0.393874	3.67e-05	16.9222
Hand grip strength (left)	rs2431112	A	G	1.4e-10	-0.00958496	0.00149514	0.440641	4.53e-05	20.8799
Hand grip strength (left)	rs2631360	A	G	1.9e-13	-0.0109177	0.00148434	0.519209	5.95e-05	27.4372
Hand grip strength (left)	rs6882168	T	C	2.8e-09	-0.00935387	0.00157364	0.337417	3.91e-05	18.0368
Hand grip strength (left)	rs113918482	G	A	1.5e-08	-0.0101011	0.00178515	0.222507	3.53e-05	16.276
Hand grip strength (left)	rs2974438	A	G	3.3e-08	-0.0100735	0.00182387	0.211026	3.38e-05	15.5786
Hand grip strength (left)	rs12528131	G	A	2.8e-09	-0.00882788	0.00148565	0.488343	3.89e-05	17.9551
Hand grip strength (left)	rs9371201	T	C	3e-09	-0.00933847	0.0015738	0.335102	3.89e-05	17.9165
Hand grip strength (left)	rs77485342	T	C	3.5e-09	0.0329675	0.00558187	0.018003	3.84e-05	17.7173
Hand grip strength (left)	rs9388769	A	G	5.1e-19	-0.0140821	0.00158065	0.67318	8.73e-05	40.2315
Hand grip strength (left)	rs35175534	C	A	3.6e-12	-0.0163733	0.00235477	0.139986	6.45e-05	29.7608
Hand grip strength (left)	rs723588	C	T	1.6e-09	0.0127904	0.00211948	0.142598	4e-05	18.4432
Hand grip strength (left)	rs11243202	C	T	7e-11	0.00972237	0.0014909	0.486019	4.72e-05	21.773
Hand grip strength (left)	rs2038760	T	C	6.6e-09	-0.0115262	0.00198662	0.170908	3.77e-05	17.3583
Hand grip strength (left)	rs41271299	T	C	3e-10	0.0211891	0.00336402	0.051241	4.37e-05	20.1266
Hand grip strength (left)	rs9371881	A	G	9.6e-10	0.00947946	0.00154996	0.359174	4.14e-05	19.0714
Hand grip strength (left)	rs4621706	T	C	6e-15	-0.0117068	0.00150003	0.544473	6.8e-05	31.3437
Hand grip strength (left)	rs11769549	A	T	4.5e-11	0.0204956	0.00311228	0.062372	4.91e-05	22.6525
Hand grip strength (left)	rs12533765	G	A	2.6e-08	-0.0092	0.00165199	0.280054	3.41e-05	15.7357
Hand grip strength (left)	rs16870531	T	C	1.3e-10	0.011198	0.00174241	0.238492	4.55e-05	20.9992
Hand grip strength (left)	rs13227429	C	T	9.8e-09	-0.00858767	0.0014977	0.561343	3.63e-05	16.7445
Hand grip strength (left)	rs6977081	T	G	1.4e-20	0.0147525	0.00158641	0.333835	9.68e-05	44.6314
Hand grip strength (left)	rs12673062	A	G	2.6e-09	-0.0107691	0.00180808	0.215756	3.92e-05	18.0944
Hand grip strength (left)	rs73307079	C	T	1.4e-09	0.0111025	0.00183407	0.211119	4.11e-05	18.93
Hand grip strength (left)	rs6962338	G	A	3.2e-09	-0.0214095	0.0036171	0.043993	3.86e-05	17.7758
Hand grip strength (left)	rs17282763	C	T	4.4e-08	0.00893956	0.00163298	0.296281	3.33e-05	15.364
Hand grip strength (left)	rs821100	G	A	1.5e-09	-0.0101977	0.00168615	0.265512	4.06e-05	18.7001
Hand grip strength (left)	rs59116179	T	C	2.4e-08	0.00857385	0.00153635	0.617442	3.47e-05	16.0108
Hand grip strength (left)	rs4737446	T	G	1.2e-10	0.0104178	0.00161882	0.694626	4.6e-05	21.228
Hand grip strength (left)	rs1486925	C	T	6.3e-11	-0.0104734	0.00160211	0.314604	4.73e-05	21.81
Hand grip strength (left)	rs4398863	C	G	2e-08	-0.00945015	0.00168454	0.7368	3.46e-05	15.9691
Hand grip strength (left)	rs4739739	G	A	1.4e-08	-0.00853387	0.00150466	0.415057	3.54e-05	16.3036
Hand grip strength (left)	rs10097417	G	A	1.9e-11	-0.0132302	0.00197055	0.170904	4.96e-05	22.8699
Hand grip strength (left)	rs7026798	C	T	4.6e-08	0.00823598	0.00150641	0.43232	3.33e-05	15.35
Hand grip strength (left)	rs7856625	T	C	2.5e-13	-0.0111297	0.0015209	0.609861	5.89e-05	27.1767
Hand grip strength (left)	rs16910750	C	G	3.6e-08	0.0112498	0.00204139	0.159639	3.4e-05	15.6553
Hand grip strength (left)	rs116922558	G	A	2.1e-08	-0.0215842	0.00385425	0.039916	3.57e-05	16.4626
Hand grip strength (left)	rs2789514	A	G	4.9e-08	0.0120546	0.00220932	0.867941	3.33e-05	15.3579
Hand grip strength (left)	rs10988217	G	A	1.7e-09	-0.00920657	0.00152911	0.603742	4.06e-05	18.698
Hand grip strength (left)	rs11002322	T	G	2.1e-10	-0.00998924	0.00157255	0.340459	4.48e-05	20.6607
Hand grip strength (left)	rs10786706	T	C	1.7e-11	0.0100072	0.00148741	0.465745	4.98e-05	22.9772
Hand grip strength (left)	rs35236379	T	G	5.8e-09	0.0123565	0.00212204	0.142324	3.73e-05	17.1855
Hand grip strength (left)	rs11003014	G	A	1.6e-08	0.011433	0.00202143	0.161184	3.53e-05	16.2959
Hand grip strength (left)	rs4962700	G	C	3.2e-08	0.00904307	0.00163488	0.301977	3.45e-05	15.8944
Hand grip strength (left)	rs772014	G	A	2.7e-12	-0.0106178	0.00151891	0.392538	5.38e-05	24.7883
Hand grip strength (left)	rs10821939	A	G	4.9e-10	-0.00935422	0.00150339	0.573342	4.28e-05	19.737
Hand grip strength (left)	rs1556659	T	C	2.5e-26	0.0162896	0.00153452	0.38153	0.000125227	57.7399
Hand grip strength (left)	rs72977282	A	T	7.8e-25	-0.0155569	0.00151173	0.413856	0.000117417	54.1383
Hand grip strength (left)	rs4930236	A	C	3.8e-09	0.0119032	0.00202069	0.835892	3.89e-05	17.9216
Hand grip strength (left)	rs10831903	T	C	8.1e-10	0.00928662	0.00151154	0.423383	4.21e-05	19.4137
Hand grip strength (left)	rs12790261	A	C	1.2e-20	-0.0251882	0.00270305	0.082383	9.59e-05	44.2271
Hand grip strength (left)	rs61389091	T	C	2.4e-12	0.0261627	0.00373295	0.04174	5.48e-05	25.2452
Hand grip strength (left)	rs34845616	A	G	4e-10	0.0108395	0.00173373	0.245653	4.35e-05	20.0763
Hand grip strength (left)	rs10846071	T	C	5.3e-28	-0.016641	0.00151685	0.393672	0.0001322	60.9554
Hand grip strength (left)	rs11168357	A	G	2.5e-08	-0.00962864	0.00172661	0.246008	3.44e-05	15.8568
Hand grip strength (left)	rs4575361	T	A	1.6e-11	-0.0108028	0.00160223	0.31205	5.01e-05	23.1009
Hand grip strength (left)	rs12316046	G	A	5e-30	-0.0174165	0.00152991	0.37795	0.00014263	65.7653
Hand grip strength (left)	rs7963801	C	T	4.6e-12	-0.0104348	0.00150824	0.571927	5.33e-05	24.5812
Hand grip strength (left)	rs11111267	G	A	1.9e-08	0.0108359	0.00192886	0.18106	3.48e-05	16.0536
Hand grip strength (left)	rs3118903	A	G	2.7e-22	-0.0174477	0.00179692	0.219552	0.000104325	48.1013
Hand grip strength (left)	rs56060323	T	C	1.5e-08	0.00906905	0.00160238	0.314543	3.55e-05	16.3513
Hand grip strength (left)	rs12889267	G	A	4.7e-12	-0.0137394	0.00198726	0.167084	5.25e-05	24.2241
Hand grip strength (left)	rs7148603	A	G	1.6e-09	0.00957206	0.00158612	0.359427	4.22e-05	19.4519
Hand grip strength (left)	rs2359239	T	C	6.9e-09	-0.00881461	0.00152153	0.391621	3.7e-05	17.0693
Hand grip strength (left)	rs10144445	G	C	1.9e-09	-0.00936876	0.00155918	0.350118	3.99e-05	18.4155
Hand grip strength (left)	rs28542042	T	C	1.2e-11	0.0110101	0.00162277	0.308877	5.18e-05	23.8616
Hand grip strength (left)	rs12906830	C	T	9.3e-13	0.0108401	0.00151797	0.601065	5.64e-05	25.9817
Hand grip strength (left)	rs17466480	G	A	9.8e-15	-0.0118235	0.00152732	0.386968	6.63e-05	30.5797
Hand grip strength (left)	rs12914702	A	G	9.3e-11	0.0109514	0.00169071	0.300395	5.04e-05	23.2413
Hand grip strength (left)	rs7176095	G	A	1.7e-09	-0.013375	0.00222025	0.128192	4e-05	18.4349
Hand grip strength (left)	rs2871865	G	C	5e-21	-0.0217979	0.00231659	0.116247	9.76e-05	45.013
Hand grip strength (left)	rs13337177	T	G	1.6e-13	-0.0142799	0.00193621	0.180836	6.04e-05	27.8539
Hand grip strength (left)	rs9944324	G	A	1.2e-08	-0.00855272	0.00150169	0.456723	3.63e-05	16.736
Hand grip strength (left)	rs7197751	T	G	1.4e-09	-0.00946321	0.00156268	0.363019	4.14e-05	19.0943
Hand grip strength (left)	rs181766	C	T	1.9e-09	0.00963247	0.00160372	0.321793	4.05e-05	18.6718
Hand grip strength (left)	rs11076004	A	G	2.1e-14	-0.0115356	0.00150909	0.418177	6.48e-05	29.8547
Hand grip strength (left)	rs755547	A	G	3.2e-18	0.0165156	0.00189766	0.188906	8.36e-05	38.5386
Hand grip strength (left)	rs2532111	G	A	4.1e-11	0.0102852	0.00155794	0.639542	4.88e-05	22.4866
Hand grip strength (left)	rs999493	A	G	6.2e-17	0.0128713	0.00153936	0.621921	7.79e-05	35.9211
Hand grip strength (left)	rs2587505	C	T	2.3e-09	-0.00900424	0.00150694	0.419871	3.95e-05	18.2098
Hand grip strength (left)	rs4308051	G	T	1.4e-18	0.0159929	0.00181863	0.789105	8.51e-05	39.2506
Hand grip strength (left)	rs62081464	T	C	2.8e-08	-0.0098827	0.00177979	0.227338	3.43e-05	15.8191
Hand grip strength (left)	rs143002906	T	C	9.8e-09	0.0262281	0.00457421	0.027829	3.72e-05	17.161
Hand grip strength (left)	rs35054365	A	T	1.2e-17	0.0128072	0.00149718	0.437643	8.07e-05	37.2245
Hand grip strength (left)	rs10403906	A	G	1.5e-11	-0.0100323	0.00148665	0.476375	5.02e-05	23.1497
Hand grip strength (left)	rs11669079	T	A	1.9e-11	0.0109542	0.00163169	0.705026	4.99e-05	23.0105
Hand grip strength (left)	rs8101782	C	A	2.9e-08	0.00955082	0.00172167	0.702702	3.81e-05	17.5717
Hand grip strength (left)	rs8108461	C	T	2.6e-10	0.00952393	0.0015066	0.572775	4.44e-05	20.4666
Hand grip strength (left)	rs143384	G	A	1.5e-43	0.0209202	0.00151159	0.404388	0.000210826	97.2162
Hand grip strength (left)	rs4811040	G	C	3e-08	-0.00924973	0.00166896	0.276636	3.42e-05	15.7867
Hand grip strength (left)	rs9611273	T	C	4.5e-10	0.0107888	0.00173048	0.25267	4.4e-05	20.2668
Hand grip strength (left)	rs6006984	C	T	2.6e-09	0.00984917	0.00165413	0.277764	3.89e-05	17.9442

## Sheet: Supplementary Table 3
exposure	SNP	effect_allele.exposure	other_allele.exposure	pval.exposure	beta.exposure	se.exposure	eaf.exposure	R2	F
Hand grip strength (right)	rs58670122	G	A	7.4e-10	-0.0132234	0.00214787	0.14316	4.29e-05	19.7779
Hand grip strength (right)	rs10798876	G	C	4.3e-09	0.00879466	0.00149794	0.55229	3.83e-05	17.6349
Hand grip strength (right)	rs10798483	A	G	2.8e-22	0.0145083	0.00149469	0.54729	0.000104304	48.0916
Hand grip strength (right)	rs6693965	T	G	3.2e-13	-0.016251	0.00223033	0.12803	5.9e-05	27.1865
Hand grip strength (right)	rs4927015	A	G	5e-18	0.013059	0.00150895	0.582858	8.29e-05	38.2346
Hand grip strength (right)	rs1952256	G	A	4.1e-10	0.00976791	0.00156323	0.345023	4.31e-05	19.8815
Hand grip strength (right)	rs35304341	A	G	4e-08	-0.0142862	0.00260278	0.089496	3.33e-05	15.3351
Hand grip strength (right)	rs823130	T	C	1.7e-16	-0.0123872	0.00150332	0.432873	7.53e-05	34.7355
Hand grip strength (right)	rs56144131	C	T	3.8e-10	-0.01307	0.00208666	0.149344	4.34e-05	20.0108
Hand grip strength (right)	rs7549184	A	G	5.8e-09	0.01056	0.00181367	0.787331	3.73e-05	17.2171
Hand grip strength (right)	rs10799428	T	C	4.6e-14	-0.0143588	0.00190367	0.18721	6.27e-05	28.9284
Hand grip strength (right)	rs12562146	A	T	2e-08	0.0118706	0.00211554	0.145156	3.5e-05	16.1226
Hand grip strength (right)	rs2147461	C	T	6.1e-09	0.0134299	0.00231042	0.117274	3.73e-05	17.2164
Hand grip strength (right)	rs4121165	A	G	4.8e-11	-0.0119792	0.00182142	0.211455	4.79e-05	22.0635
Hand grip strength (right)	rs6693567	T	C	6.3e-09	-0.00974656	0.00167765	0.733032	3.72e-05	17.1417
Hand grip strength (right)	rs1892425	A	G	1.1e-10	0.0113357	0.00175726	0.238631	4.67e-05	21.5274
Hand grip strength (right)	rs150330307	C	T	1.2e-14	-0.0325831	0.00422401	0.031875	6.55e-05	30.2098
Hand grip strength (right)	rs1442883	A	C	5.8e-10	-0.0106189	0.00171426	0.253067	4.26e-05	19.6539
Hand grip strength (right)	rs6711390	T	C	4e-18	0.0132663	0.00152876	0.37107	8.21e-05	37.8745
Hand grip strength (right)	rs35833641	G	A	8.5e-09	0.00922306	0.00160181	0.312389	3.65e-05	16.8484
Hand grip strength (right)	rs1840753	T	C	1.4e-08	0.0176942	0.00312088	0.062797	3.69e-05	16.9904
Hand grip strength (right)	rs2894602	G	A	9.9e-09	0.0101332	0.00176778	0.766101	3.68e-05	16.9659
Hand grip strength (right)	rs7565148	G	T	3.6e-12	-0.0103511	0.00148921	0.500863	5.36e-05	24.6995
Hand grip strength (right)	rs7576964	T	G	5.3e-10	0.00974539	0.00156908	0.342052	4.27e-05	19.7085
Hand grip strength (right)	rs34030812	C	T	3.3e-09	-0.00912858	0.00154266	0.36737	3.87e-05	17.8579
Hand grip strength (right)	rs7575451	G	C	9.3e-12	-0.0106047	0.00155571	0.649801	5.12e-05	23.5976
Hand grip strength (right)	rs12616285	G	T	5.4e-09	0.0122195	0.00209396	0.148607	3.78e-05	17.4199
Hand grip strength (right)	rs6715064	T	C	9.6e-09	-0.00921128	0.00160563	0.310405	3.63e-05	16.7468
Hand grip strength (right)	rs1641457	G	T	2.4e-13	0.0130726	0.00178536	0.223327	5.93e-05	27.3327
Hand grip strength (right)	rs3771498	T	C	1.9e-21	0.0141605	0.00148856	0.514178	0.000100179	46.1897
Hand grip strength (right)	rs12052508	T	C	4.7e-09	-0.0133517	0.00227992	0.879044	3.79e-05	17.4776
Hand grip strength (right)	rs10193039	T	A	4.1e-10	-0.0103284	0.00165217	0.28057	4.31e-05	19.8549
Hand grip strength (right)	rs2194747	G	A	1.9e-09	0.00985126	0.00163925	0.707014	4.02e-05	18.5366
Hand grip strength (right)	rs6792762	A	G	1.8e-09	-0.00911683	0.0015155	0.419501	4.05e-05	18.6635
Hand grip strength (right)	rs7652177	G	C	7.9e-09	0.00858128	0.00148684	0.504702	3.68e-05	16.9737
Hand grip strength (right)	rs2194411	A	G	2.1e-10	0.0142831	0.00224795	0.128444	4.57e-05	21.0585
Hand grip strength (right)	rs1440152	G	C	3.5e-08	0.00827068	0.00149983	0.444561	3.38e-05	15.5747
Hand grip strength (right)	rs2362972	A	C	1.3e-08	-0.00856859	0.00150767	0.577904	3.58e-05	16.5141
Hand grip strength (right)	rs62234790	A	C	8.8e-10	0.0105846	0.0017265	0.245816	4.15e-05	19.1517
Hand grip strength (right)	rs2341184	C	T	1.7e-09	0.0100606	0.00167125	0.271748	4.01e-05	18.47
Hand grip strength (right)	rs35457492	C	A	2.2e-08	0.00833889	0.00149104	0.495364	3.48e-05	16.0283
Hand grip strength (right)	rs9757079	T	C	8.4e-10	0.00980223	0.00159699	0.318301	4.17e-05	19.2244
Hand grip strength (right)	rs71298370	A	G	8.9e-10	0.0165994	0.00270846	0.086217	4.34e-05	20.0167
Hand grip strength (right)	rs9853018	T	C	8.8e-12	0.0101977	0.00149426	0.443249	5.13e-05	23.664
Hand grip strength (right)	rs34587452	C	G	9.1e-10	-0.0110867	0.00181019	0.215181	4.15e-05	19.1403
Hand grip strength (right)	rs7657558	G	T	1.1e-10	0.0107255	0.00166228	0.719597	4.64e-05	21.4033
Hand grip strength (right)	rs114924396	G	A	8.2e-09	-0.0191251	0.00331785	0.05363	3.71e-05	17.1177
Hand grip strength (right)	rs13146142	C	T	1.4e-24	-0.0207968	0.00203165	0.158627	0.000115449	53.2307
Hand grip strength (right)	rs13106087	C	T	6.2e-11	0.0129259	0.001977	0.829827	4.72e-05	21.7557
Hand grip strength (right)	rs997850	C	G	3.7e-09	-0.0090224	0.00153019	0.60473	3.89e-05	17.942
Hand grip strength (right)	rs13169333	C	T	4.3e-08	0.00929083	0.00169626	0.260299	3.32e-05	15.3252
Hand grip strength (right)	rs12522139	G	T	6.8e-09	-0.0114381	0.00197332	0.171144	3.71e-05	17.1127
Hand grip strength (right)	rs6882168	T	C	7.9e-09	-0.00909312	0.00157605	0.337386	3.7e-05	17.0445
Hand grip strength (right)	rs13356200	G	T	1.8e-09	-0.00920983	0.00153092	0.393811	4.05e-05	18.6711
Hand grip strength (right)	rs6870324	G	C	3e-09	-0.00998568	0.00168316	0.269673	3.93e-05	18.1084
Hand grip strength (right)	rs13355365	T	C	3.4e-08	-0.00846604	0.00153398	0.379543	3.38e-05	15.5633
Hand grip strength (right)	rs4868110	T	A	1e-09	-0.00971069	0.00158981	0.323165	4.13e-05	19.0186
Hand grip strength (right)	rs2431112	A	G	8.6e-14	-0.011172	0.00149737	0.440644	6.15e-05	28.3673
Hand grip strength (right)	rs2631360	A	G	5.4e-14	-0.0111803	0.00148648	0.519189	6.24e-05	28.7732
Hand grip strength (right)	rs2322754	A	G	3.8e-09	-0.0117022	0.00198538	0.831641	3.83e-05	17.6798
Hand grip strength (right)	rs9322822	T	C	3.5e-12	0.0110799	0.00159266	0.320183	5.34e-05	24.6399
Hand grip strength (right)	rs9388051	A	G	2.7e-08	0.0106262	0.0019116	0.186051	3.42e-05	15.7672
Hand grip strength (right)	rs7451021	C	T	7.7e-23	-0.0157967	0.00160573	0.689474	0.000106851	49.2661
Hand grip strength (right)	rs113835839	T	C	1.1e-08	-0.00986353	0.00172486	0.247871	3.63e-05	16.7245
Hand grip strength (right)	rs11243202	C	T	6.5e-15	0.0116378	0.00149304	0.486018	6.77e-05	31.1979
Hand grip strength (right)	rs645144	C	T	4.3e-08	-0.00868793	0.00158627	0.329996	3.34e-05	15.3882
Hand grip strength (right)	rs721101	C	T	1.6e-08	0.00946697	0.0016742	0.271238	3.54e-05	16.3353
Hand grip strength (right)	rs77485342	T	C	2.6e-10	0.0353373	0.0055898	0.018008	4.42e-05	20.3616
Hand grip strength (right)	rs1125	A	G	1.9e-10	-0.0100304	0.00157472	0.336554	4.49e-05	20.7143
Hand grip strength (right)	rs9396861	A	C	5.7e-10	-0.00962972	0.00155347	0.598901	4.46e-05	20.5403
Hand grip strength (right)	rs35175534	C	A	4.2e-16	-0.0191822	0.00235828	0.139977	8.86e-05	40.8466
Hand grip strength (right)	rs1885690	A	C	2.8e-08	-0.00839964	0.00151212	0.410365	3.41e-05	15.7414
Hand grip strength (right)	rs852520	A	C	1.5e-08	-0.00890306	0.00157301	0.662481	3.54e-05	16.3425
Hand grip strength (right)	rs4549685	T	C	8.1e-10	0.00971494	0.00158124	0.329917	4.17e-05	19.2391
Hand grip strength (right)	rs112330055	A	G	1.7e-08	0.0179824	0.00319007	0.062972	3.82e-05	17.594
Hand grip strength (right)	rs7790322	T	C	1.2e-08	-0.00860301	0.0015092	0.415619	3.6e-05	16.5753
Hand grip strength (right)	rs6962338	G	A	2e-08	-0.0203488	0.00362338	0.043971	3.48e-05	16.0503
Hand grip strength (right)	rs6977081	T	G	5.7e-16	0.01286	0.00158867	0.333818	7.36e-05	33.9133
Hand grip strength (right)	rs2389763	C	T	3.8e-08	-0.00832615	0.00151353	0.591848	3.35e-05	15.4415
Hand grip strength (right)	rs2717351	G	A	3.4e-12	0.0127695	0.00183473	0.211783	5.44e-05	25.0993
Hand grip strength (right)	rs9639938	G	C	5.2e-09	0.00873031	0.0014948	0.540731	3.79e-05	17.4533
Hand grip strength (right)	rs4730984	T	G	1.8e-09	0.0104789	0.00174245	0.239566	4e-05	18.4454
Hand grip strength (right)	rs4737446	T	G	2.4e-10	0.0102668	0.00162131	0.694661	4.47e-05	20.6157
Hand grip strength (right)	rs62509875	G	A	2.4e-11	-0.0131798	0.00197325	0.170951	4.92e-05	22.701
Hand grip strength (right)	rs1486925	C	T	2.9e-09	-0.0095288	0.00160467	0.314649	3.92e-05	18.0545
Hand grip strength (right)	rs6473015	C	A	5.5e-09	0.00959961	0.00164629	0.285659	3.76e-05	17.3393
Hand grip strength (right)	rs7871404	G	A	3.4e-10	0.0119345	0.00190074	0.188654	4.36e-05	20.1026
Hand grip strength (right)	rs116922558	G	A	1.8e-10	-0.0246271	0.00386049	0.039907	4.65e-05	21.4271
Hand grip strength (right)	rs2208562	T	C	3.1e-14	-0.0115616	0.00152246	0.609627	6.36e-05	29.3333
Hand grip strength (right)	rs7034200	A	C	5.3e-09	0.00868874	0.00148875	0.480149	3.77e-05	17.3755
Hand grip strength (right)	rs113851275	A	G	4.3e-08	0.0131425	0.00239826	0.107596	3.32e-05	15.2926
Hand grip strength (right)	rs11998884	T	C	2.8e-08	0.0173433	0.0031243	0.061825	3.49e-05	16.0872
Hand grip strength (right)	rs10761411	T	C	1.3e-08	-0.0114975	0.00202082	0.812419	4.03e-05	18.5758
Hand grip strength (right)	rs72820369	T	A	4.4e-12	0.0161266	0.00232961	0.117642	5.4e-05	24.8926
Hand grip strength (right)	rs4751671	A	G	4.1e-08	0.0082332	0.00150019	0.530724	3.38e-05	15.5669
Hand grip strength (right)	rs4752689	A	G	6.4e-09	0.0087531	0.00150761	0.584246	3.72e-05	17.1603
Hand grip strength (right)	rs12412806	A	G	3e-08	-0.00909582	0.00164139	0.294214	3.44e-05	15.8412
Hand grip strength (right)	rs2273555	A	G	4.2e-13	0.0110316	0.00152155	0.606106	5.81e-05	26.7907
Hand grip strength (right)	rs4962700	G	C	1.2e-08	0.00932733	0.00163735	0.302017	3.67e-05	16.9107
Hand grip strength (right)	rs1556659	T	C	3.8e-30	0.0175345	0.00153689	0.381531	0.000145099	66.9038
Hand grip strength (right)	rs12763284	G	A	1.2e-10	0.00959741	0.00148928	0.466048	4.58e-05	21.1356
Hand grip strength (right)	rs11022513	T	C	1.1e-09	-0.00921054	0.00151016	0.569312	4.16e-05	19.1803
Hand grip strength (right)	rs2244621	T	C	4.5e-08	0.0115957	0.00211936	0.144157	3.32e-05	15.2965
Hand grip strength (right)	rs61389091	T	C	3.6e-09	0.0220553	0.00373782	0.041752	3.89e-05	17.9453
Hand grip strength (right)	rs34845616	A	G	1.7e-08	0.00979506	0.00173626	0.245647	3.56e-05	16.3934
Hand grip strength (right)	rs12790261	A	C	2e-22	-0.0263714	0.00270734	0.082377	0.00010514	48.477
Hand grip strength (right)	rs72977282	A	T	1.2e-28	-0.016811	0.00151401	0.413909	0.000137116	63.2223
Hand grip strength (right)	rs6592737	T	A	2e-09	-0.00924791	0.00154126	0.37154	3.99e-05	18.4137
Hand grip strength (right)	rs10770125	G	A	1.4e-08	0.00844132	0.00148775	0.477072	3.56e-05	16.3914
Hand grip strength (right)	rs1635527	C	G	6.8e-11	0.00975325	0.001495	0.547486	4.71e-05	21.7309
Hand grip strength (right)	rs7301953	A	G	6.4e-13	-0.0115397	0.00160449	0.312268	5.72e-05	26.3702
Hand grip strength (right)	rs10846071	T	C	6.5e-25	-0.0156575	0.00151902	0.393685	0.000117037	53.963
Hand grip strength (right)	rs12823922	G	A	1.6e-10	-0.0114203	0.00178649	0.222184	4.51e-05	20.7835
Hand grip strength (right)	rs10784502	T	C	7.1e-14	-0.0111247	0.00148608	0.512218	6.18e-05	28.5127
Hand grip strength (right)	rs7963801	C	T	8.4e-14	-0.0112734	0.00151048	0.571983	6.22e-05	28.6903
Hand grip strength (right)	rs12316046	G	A	3.8e-26	-0.0162046	0.00153212	0.377959	0.000123473	56.9308
Hand grip strength (right)	rs4768725	C	T	2.3e-08	0.00905894	0.00162081	0.699597	3.45e-05	15.9029
Hand grip strength (right)	rs7953280	C	G	1.8e-09	-0.00898631	0.00149436	0.506945	4.04e-05	18.6119
Hand grip strength (right)	rs3118914	T	G	5.9e-27	-0.0194408	0.00180843	0.215004	0.000127577	58.8235
Hand grip strength (right)	rs2296316	C	T	4.6e-08	-0.00821333	0.00150213	0.464404	3.36e-05	15.4718
Hand grip strength (right)	rs12889267	G	A	6.7e-10	-0.0122874	0.0019904	0.167048	4.2e-05	19.371
Hand grip strength (right)	rs935728	T	C	1.8e-09	0.00955337	0.0015872	0.327604	4.02e-05	18.5378
Hand grip strength (right)	rs7148603	A	G	4.7e-09	0.00930613	0.00158837	0.359456	3.99e-05	18.3867
Hand grip strength (right)	rs10483727	C	T	3.3e-09	-0.00901803	0.00152456	0.610138	3.87e-05	17.8374
Hand grip strength (right)	rs9652468	A	G	3.3e-13	-0.0125308	0.00172118	0.249359	5.88e-05	27.1015
Hand grip strength (right)	rs2871865	G	C	1.8e-24	-0.0236863	0.00232022	0.116217	0.00011525	53.139
Hand grip strength (right)	rs2165241	C	T	1.9e-16	0.0122486	0.00148844	0.508842	7.5e-05	34.5751
Hand grip strength (right)	rs4553566	C	T	4.6e-10	-0.00930181	0.00149229	0.453271	4.29e-05	19.7714
Hand grip strength (right)	rs12914702	A	G	1.9e-10	0.0107788	0.00169282	0.300438	4.88e-05	22.5163
Hand grip strength (right)	rs12101479	C	G	1.5e-09	-0.0106133	0.0017554	0.237244	4.08e-05	18.7955
Hand grip strength (right)	rs12899474	T	C	5.4e-10	-0.0148939	0.00239936	0.108065	4.28e-05	19.7155
Hand grip strength (right)	rs246181	T	C	3.7e-10	0.00970432	0.00154856	0.373429	4.41e-05	20.318
Hand grip strength (right)	rs8055199	A	G	1.2e-08	-0.00896262	0.00157271	0.660123	3.6e-05	16.6183
Hand grip strength (right)	rs7206195	T	C	2.8e-15	-0.0153211	0.00193924	0.180373	6.94e-05	32.0001
Hand grip strength (right)	rs248831	A	G	8.4e-09	0.00988989	0.00171686	0.265259	3.81e-05	17.5775
Hand grip strength (right)	rs62037412	A	G	1.9e-09	0.00932966	0.0015542	0.357285	4e-05	18.4304
Hand grip strength (right)	rs4785574	G	A	4.5e-12	-0.0103769	0.00149954	0.555329	5.32e-05	24.5189
Hand grip strength (right)	rs3848369	T	C	4.7e-10	-0.00953776	0.00153126	0.38657	4.31e-05	19.8911
Hand grip strength (right)	rs76749769	T	C	2.2e-08	0.0144315	0.00257957	0.091199	3.45e-05	15.9166
Hand grip strength (right)	rs4784329	C	A	9e-19	-0.0133357	0.00150734	0.426476	8.7e-05	40.1115
Hand grip strength (right)	rs7214252	A	G	2e-08	-0.0102442	0.00182532	0.211101	3.5e-05	16.1152
Hand grip strength (right)	rs2854152	G	A	6e-12	0.010991	0.00159765	0.678266	5.27e-05	24.3079
Hand grip strength (right)	rs1043515	G	A	2.8e-20	0.0138281	0.00149848	0.566183	9.39e-05	43.3095
Hand grip strength (right)	rs12452505	G	C	1.4e-11	-0.0144313	0.00213545	0.142315	5.08e-05	23.4404
Hand grip strength (right)	rs2587505	C	T	8.1e-10	-0.0092717	0.0015091	0.419822	4.19e-05	19.3071
Hand grip strength (right)	rs4793658	C	A	3.8e-08	-0.0136707	0.00248614	0.110375	3.67e-05	16.9211
Hand grip strength (right)	rs56074046	A	G	4.4e-09	-0.00903502	0.00153954	0.371748	3.81e-05	17.5797
Hand grip strength (right)	rs10520770	C	T	4.5e-15	0.011742	0.00149773	0.44929	6.82e-05	31.457
Hand grip strength (right)	rs635538	A	G	1.5e-16	-0.0219943	0.00266274	0.913868	7.62e-05	35.1119
Hand grip strength (right)	rs4369779	C	T	3.4e-21	0.017203	0.00182068	0.789015	9.85e-05	45.4299
Hand grip strength (right)	rs34217742	A	T	1.4e-10	0.0146245	0.00227778	0.124284	4.66e-05	21.4642
Hand grip strength (right)	rs7249	T	C	4e-08	0.00848186	0.00154442	0.365956	3.34e-05	15.3921
Hand grip strength (right)	rs4802848	C	G	3.8e-11	0.0110767	0.00167496	0.730261	4.83e-05	22.2852
Hand grip strength (right)	rs36065733	G	T	8.2e-11	0.00971991	0.00149596	0.472588	4.71e-05	21.7136
Hand grip strength (right)	rs79723785	C	T	1.6e-08	-0.0340504	0.00602877	0.016495	3.76e-05	17.3438
Hand grip strength (right)	rs7266065	A	G	4.6e-10	0.00993881	0.00159481	0.322982	4.32e-05	19.9168
Hand grip strength (right)	rs911642	T	C	2e-08	0.00862996	0.00153783	0.375746	3.49e-05	16.108
Hand grip strength (right)	rs6063504	G	C	7.8e-09	0.00862345	0.0014938	0.492707	3.72e-05	17.1388
Hand grip strength (right)	rs143384	G	A	2.5e-52	0.0230423	0.00151366	0.404392	0.000255767	117.945
Hand grip strength (right)	rs2226685	C	T	3.1e-09	0.0103333	0.00174324	0.758696	3.91e-05	18.0252
Hand grip strength (right)	rs6006984	C	T	5.1e-10	0.0102987	0.00165665	0.277766	4.26e-05	19.6198

## Sheet: Supplementary Table 4
exposure	SNP	effect_allele.exposure	other_allele.exposure	pval.exposure	beta.exposure	se.exposure	eaf.exposure	R2	F
Usual walking pace	rs113825410	G	A	6.4e-09	-0.00881182	0.00151778	0.224386	2.7e-05	12.4305
Usual walking pace	rs12747822	A	T	3.8e-08	0.0117683	0.00213998	0.09792	2.45e-05	11.2528
Usual walking pace	rs139398785	G	C	4.2e-08	-0.00999513	0.00182329	0.140415	2.41e-05	11.0916
Usual walking pace	rs11682482	G	T	3.3e-09	0.00801894	0.00135595	0.680801	2.79e-05	12.8539
Usual walking pace	rs830627	A	G	7.7e-09	0.00742054	0.00128505	0.417471	2.68e-05	12.3178
Usual walking pace	rs6763292	G	A	3.8e-10	0.00958833	0.00153076	0.780939	3.15e-05	14.4673
Usual walking pace	rs28519617	G	T	1.4e-08	-0.00812933	0.0014336	0.269813	2.6e-05	11.9763
Usual walking pace	rs11732213	C	T	9.4e-09	0.0091614	0.00159593	0.195605	2.64e-05	12.1476
Usual walking pace	rs144333966	G	A	2.2e-08	0.0304614	0.00544615	0.014646	2.68e-05	12.3177
Usual walking pace	rs35711462	G	A	1.7e-08	-0.0071659	0.00126947	0.511213	2.57e-05	11.8027
Usual walking pace	rs11152989	T	C	3.9e-08	-0.00751226	0.00136699	0.312264	2.42e-05	11.1481
Usual walking pace	rs4839898	A	G	2.3e-10	0.0130564	0.00206037	0.109786	3.33e-05	15.3253
Usual walking pace	rs9366651	T	G	8.6e-14	0.00948542	0.00127132	0.507037	4.5e-05	20.6868
Usual walking pace	rs7789719	C	T	2.7e-08	0.00854199	0.00153719	0.782126	2.49e-05	11.4371
Usual walking pace	rs11761141	G	T	5e-09	-0.00789936	0.00135132	0.325697	2.74e-05	12.6058
Usual walking pace	rs4109292	A	G	6.6e-09	0.00735336	0.00126787	0.493943	2.7e-05	12.4327
Usual walking pace	rs10883618	A	G	2.4e-09	0.0078103	0.00130834	0.372248	2.85e-05	13.1122
Usual walking pace	rs10828258	G	A	6.7e-12	-0.00932641	0.00135882	0.319319	3.78e-05	17.3908
Usual walking pace	rs2439823	G	A	1.1e-08	-0.0072789	0.00127453	0.545578	2.63e-05	12.0827
Usual walking pace	rs10750025	T	C	9.4e-10	-0.0083554	0.00136528	0.681757	3.03e-05	13.9329
Usual walking pace	rs10862220	G	T	4.8e-10	0.00840767	0.00135051	0.674897	3.1e-05	14.2669
Usual walking pace	rs2645979	A	G	6.7e-11	0.00861798	0.00132024	0.357204	3.41e-05	15.6863
Usual walking pace	rs2170670	A	G	4.7e-08	-0.00708769	0.0012972	0.606925	2.4e-05	11.0239
Usual walking pace	rs45583845	G	C	4.3e-08	-0.0198998	0.0036328	0.034279	2.62e-05	12.0585
Usual walking pace	rs8011870	A	G	2.6e-08	-0.00782739	0.00140635	0.288257	2.51e-05	11.5625
Usual walking pace	rs8010773	C	T	3.4e-10	-0.00816754	0.00130079	0.38208	3.15e-05	14.4873
Usual walking pace	rs11848096	C	T	9.2e-09	-0.00750831	0.00130696	0.386669	2.67e-05	12.298
Usual walking pace	rs8028757	T	A	2.4e-08	0.0107284	0.00192335	0.130387	2.61e-05	12.0046
Usual walking pace	rs4516268	A	C	9.5e-10	0.00983008	0.00160664	0.193704	3.02e-05	13.8824
Usual walking pace	rs4643373	C	T	2.3e-08	0.0077266	0.00138223	0.299973	2.51e-05	11.5316
Usual walking pace	rs11077815	C	T	4.8e-08	-0.00713336	0.00130691	0.623657	2.39e-05	10.9859
Usual walking pace	rs11881338	A	T	1.3e-10	0.00817022	0.00127146	0.48742	3.34e-05	15.341
Usual walking pace	rs2602731	G	A	2.1e-08	-0.00766675	0.00136907	0.681058	2.55e-05	11.7445
Usual walking pace	rs2037735	T	C	6.7e-09	-0.0112677	0.00194308	0.120628	2.69e-05	12.3882
Usual walking pace	rs12461902	A	G	3.6e-09	-0.00801134	0.00135739	0.329608	2.84e-05	13.0453
Usual walking pace	rs819167	G	A	1.1e-09	-0.0157993	0.00259282	0.936466	2.97e-05	13.6613

## Sheet: Supplementary Table 5
exposure	SNP	effect_allele.exposure	other_allele.exposure	pval.exposure	beta.exposure	se.exposure	eaf.exposure	R2	F
AIS	rs2758612	C	T	3.68e-09	-0.0653	0.0111	0.3547	0.001952	861.196
AIS	rs34311906	C	T	1.07e-08	0.0649	0.0113	0.4024	0.00202576	893.805
AIS	rs2634074	A	T	5.9e-15	-0.0941	0.0121	0.7877	0.00296156	1307.92
AIS	rs2066864	A	G	3.51e-08	0.0634	0.0115	0.2452	0.00148786	656.118
AIS	rs11242678	T	C	2.7e-10	0.0723	0.0114	0.255	0.00198611	876.276
AIS	rs473238	C	T	1.65e-08	-0.0831	0.0147	0.8674	0.00158853	700.583
AIS	rs4942561	T	G	1.77e-08	0.0655	0.0116	0.759	0.00156954	692.194

## Sheet: Supplementary Table 6
exposure	SNP	effect_allele.exposure	other_allele.exposure	pval.exposure	beta.exposure	se.exposure	eaf.exposure	R2	F
LAS	rs7610618	T	C	1.44e-08	0.8449	0.149	0.013	0.018319	2813.36
LAS	rs10820405	A	G	4.51e-08	-0.1812	0.0331	0.1847	0.00988851	1505.71
LAS	rs476762	A	T	1.22e-08	0.201	0.0353	0.133	0.00931736	1417.92

## Sheet: Supplementary Table 7
exposure	SNP	effect_allele.exposure	other_allele.exposure	pval.exposure	beta.exposure	se.exposure	eaf.exposure	R2	F
CES	rs146390073	T	C	2.19902e-08	0.6688	0.1195	0.0215	0.0188201	4061.81
CES	rs2466455	T	C	2.75169e-41	-0.2992	0.0222	0.7826	0.0304616	6653.25
CES	rs6838973	T	C	3.58402e-08	-0.1079	0.0196	0.4341	0.00572008	1218.26
CES	rs12932445	C	T	6.88018e-13	0.1758	0.0245	0.1805	0.00914311	1954.02

## Sheet: Supplementary Table 8
Removing the following SNPs for being palindromic with intermediate allele frequencies
Exposure	The removed SNPs
Appendicular lean mass	rs10036789, rs10657263, rs11233117, rs11562101, rs12334478 rs2174008, rs3901421, rs7137546, rs7863102, rs7971536 rs861674, rs9343327, rs9640283, rs985136
Hand grip strength (left)	rs35054365, rs72977282
Hand grip strength (right)	rs10798876, rs1440152, rs1635527, rs6063504, rs72977282 rs7652177, rs7953280, rs9639938
Usual walking pace	rs11881338
AIS	NA
LAS	NA
CES	NA

## Sheet: Supplementary Table 9
The removed potential confounder-related SNPs
Exposure	The removed SNPs
Appendicular lean mass	rs301807,rs34517439,rs10922475,rs905938,rs2390669,rs1260326,rs10203386,rs7563362,rs62106258,rs13391980 rs1047891,rs113671109,rs17718736,rs1290786,rs2194411,rs73052033,rs591668,rs1730028,rs7610055,rs1472852 rs963317,rs13103161,rs6849302,rs59950280,rs1177765,rs78000963,rs9375188,rs4380799,rs10807137,rs12672217 rs42039,rs11778491,rs10962212,rs7020491,rs72841270,rs67527161,rs11187838,rs4752829,rs7107…
Hand grip strength (left)	rs13107325, rs4713506, rs113315602, rs185320691, rs1551042, rs11125803, rs13146142, rs7124681, rs3814877, rs76895963 rs217181, rs7196917, rs113434679, rs3959716, rs11642954, rs7970350, rs635538
Hand grip strength (right)	rs13107325, rs9267806, rs113315602, rs185320691, rs35701422, rs1550115, rs75457267, rs10278546, rs76895963, rs11039348 rs600038, rs11642954, rs7196917, rs56365901, rs1047891
Usual walking pace	rs13107325, rs62048402, rs2280406, rs2644135, rs11039324, rs205262, rs4715208, rs9783304, rs891387, rs12883788 rs273512, rs7896518, rs12042959, rs57800857, rs11150623, rs55680124, rs2297600, rs613872, rs7795394, rs11548200, rs1592
AIS	rs3184504, rs2107595
LAS	rs2107595
CES	NA

[truncated: 2 more sheets: Supplementary Table 10, Supplementary Table 11]
